# Supplementary material for: Harmonization of clinical practice guidelines for primary prevention and screening: actionable recommendations and resources for primary care
Source: Springer Nature journal article supplement (doi:10.1186/s12875-024-02388-3), 2024-05-06
Supplement: MOESM1 [file 12875_2024_2388_MOESM1_ESM.pdf]

## Appendix 1 – Summary of Search Strategies

| Topic                              | Resource & Search Terms Used                                                                                 |                                                           |                                    |                                            |                                               |                                          |                                                                                     |                                                                         |                                                 |                                       |
|------------------------------------|--------------------------------------------------------------------------------------------------------------|-----------------------------------------------------------|------------------------------------|--------------------------------------------|-----------------------------------------------|------------------------------------------|-------------------------------------------------------------------------------------|-------------------------------------------------------------------------|-------------------------------------------------|---------------------------------------|
|                                    | Internet: Google<br><br>(First 3 pages of results reviewed for each search string)                           | Topic Specific                                            |                                    | CPG Databases                              |                                               | Key CPG Developers                       |                                                                                     |                                                                         |                                                 |                                       |
|                                    |                                                                                                              | Ontario Health: Cancer Care Ontario                       | CPAC Cancer Guidelines Database    | ECRI Guidelines Trust                      | CMA CPG Infobase                              | CTFPHC                                   | USPSTF                                                                              | NICE                                                                    | SIGN                                            | TOP Alberta                           |
| <b>Cervical cancer screening</b>   | - cervical cancer guideline<br>- cervical screening guideline<br>- cervical cancer screening guideline       | Search limited to "guidelines and advice"<br>- cervical   | Filter: type of cancer: Cervical   | - cervical cancer<br>- cervical screen     | - cervical cancer<br>- cervical screening     | Manually reviewed by year of publication | Manually reviewed by current recommendations: Cancer                                | Manually reviewed by conditions and diseases: Cancer                    | Manually reviewed by list of current guidelines | Manually reviewed by cancer screening |
| <b>Colorectal cancer screening</b> | - colorectal cancer guideline<br>- colorectal screening guideline<br>- colorectal cancer screening guideline | Search limited to "guidelines and advice"<br>- colorectal | Filter: type of cancer: Colorectal | - colorectal cancer<br>- colorectal screen | - colorectal cancer<br>- colorectal screening | Manually reviewed by year of publication | Manually reviewed by current recommendations: Cancer                                | Manually reviewed by conditions and diseases: Cancer                    | Manually reviewed by list of current guidelines | Manually reviewed by cancer screening |
| <b>Prostate cancer screening</b>   | - prostate cancer guideline<br>- prostate screening guideline<br>- prostate cancer screening guideline       | Search limited to "guidelines and advice"<br>- prostate   | Filter: type of cancer: Prostate   | - prostate cancer<br>- prostate screen     | - prostate cancer<br>- prostate screening     | Manually reviewed by year of publication | Manually reviewed by current recommendations: Cancer                                | Manually reviewed by conditions and diseases: Cancer                    | Manually reviewed by list of current guidelines | Manually reviewed by cancer screening |
| <b>Breast cancer screening</b>     | - breast cancer guideline<br>- breast screening guideline<br>- breast cancer screening guideline             | Search limited to "guidelines and advice"<br>- breast     | Filter: type of cancer: Breast     | - breast cancer<br>- breast screen         | - breast cancer<br>- breast screening         | Manually reviewed by year of publication | Manually reviewed by current recommendations: Cancer                                | Manually reviewed by conditions and diseases: Cancer                    | Manually reviewed by list of current guidelines | Manually reviewed by cancer screening |
| <b>Lung cancer screening</b>       | - lung cancer guideline<br>- lung screening guideline<br>- lung cancer screening guideline                   | Search limited to "guidelines and advice"<br>- lung       | Filter: type of cancer: Lung       | - lung cancer<br>- lung screen             | - lung cancer<br>- lung screening             | Manually reviewed by year of publication | Manually reviewed by current recommendations: Cancer                                | Manually reviewed by conditions and diseases: Cancer                    | Manually reviewed by list of current guidelines | Manually reviewed by cancer screening |
| <b>Type 2 diabetes</b>             | - diabetes guideline<br>- type 2 diabetes guideline                                                          | n/a                                                       | n/a                                | - diabetes                                 | - diabetes                                    | Manually reviewed by year of publication | Manually reviewed by current recs: metabolic, nutritional, and endocrine conditions | Manually reviewed by conditions and diseases: Diabetes                  | Manually reviewed by list of current guidelines | Manually reviewed by endocrinology    |
| <b>Cardiovascular disease</b>      | - cardiovascular disease guideline<br>- cardiovascular guideline<br>- cardiovascular disease risk guideline  | n/a                                                       | n/a                                | - cardiovascular                           | - cardiovascular                              | Manually reviewed by year of publication | Manually reviewed by current recs: Cardiovascular disorders                         | Manually reviewed by conditions and diseases: Cardiovascular conditions | Manually reviewed by list of current guidelines | Manually reviewed by cardiovascular   |

| Topic                       | Resource & Search Terms Used                                                                                                |                                     |                                 |                                  |                                  |                                          |                                                                                     |                                                       |                                                 |                                                    |
|-----------------------------|-----------------------------------------------------------------------------------------------------------------------------|-------------------------------------|---------------------------------|----------------------------------|----------------------------------|------------------------------------------|-------------------------------------------------------------------------------------|-------------------------------------------------------|-------------------------------------------------|----------------------------------------------------|
|                             | Internet: Google<br><br>(First 3 pages of results reviewed for each search string)                                          | Topic Specific                      |                                 | CPG Databases                    |                                  | Key CPG Developers                       |                                                                                     |                                                       |                                                 |                                                    |
|                             |                                                                                                                             | Ontario Health: Cancer Care Ontario | CPAC Cancer Guidelines Database | ECRI Guidelines Trust            | CMA CPG Infobase                 | CTFPHC                                   | USPSTF                                                                              | NICE                                                  | SIGN                                            | TOP Alberta                                        |
| Obesity                     | - obesity guideline                                                                                                         | n/a                                 | n/a                             | - obesity                        | - obesity                        | Manually reviewed by year of publication | Manually reviewed by current recs: metabolic, nutritional, and endocrine conditions | Manually reviewed by conditions and diseases: Obesity | Manually reviewed by list of current guidelines | Manually reviewed by 'other' category              |
| Depression screening        | - depression guideline<br>- depression screening guideline<br>- depressive guideline<br>- mental health screening guideline | n/a                                 | n/a                             | - depression                     | - depression                     | Manually reviewed by year of publication | Manually reviewed by current recs: mental health conditions and substance abuse     | - depression                                          | Manually reviewed by list of current guidelines | Manually reviewed by 'other' category              |
| Osteoporosis / bone density | - osteoporosis guideline<br>- bone density guideline                                                                        | n/a                                 | n/a                             | - osteoporosis<br>- bone density | - osteoporosis<br>- bone density | Manually reviewed by year of publication | Manually reviewed by current recs: musculoskeletal disorders                        | -osteoporosis                                         | Manually reviewed by list of current guidelines | Manually reviewed by 'other' category              |
| COPD                        | - COPD guideline<br>- chronic obstructive pulmonary disease guideline                                                       | n/a                                 | n/a                             | - COPD                           | - COPD                           | Manually reviewed by year of publication | - COPD                                                                              | - COPD                                                | Manually reviewed by list of current guidelines | Manually reviewed by 'other' category              |
| Hepatitis C                 | - hepatitis C guideline<br>- hepatitis C screening guideline<br>- hepatitis guideline<br>- HCV screening guideline          | n/a                                 | n/a                             | - hepatitis C                    | - hepatitis                      | Manually reviewed by year of publication | Manually reviewed by current recs: infectious diseases                              | - hepatitis                                           | Manually reviewed by list of current guidelines | Manually reviewed by 'infectious disease' category |
| Screening for alcohol use   | - alcohol guideline<br>- alcohol screening guideline<br>- drinking guideline                                                | n/a                                 | n/a                             | - alcohol<br>- drinking          | - alcohol<br>- drinking          | Manually reviewed by year of publication | Manually reviewed by current recs: mental health conditions and substance abuse     | - alcohol<br>- drinking                               | Manually reviewed by list of current guidelines | Manually reviewed by 'other' category              |
| Screening for tobacco use   | - tobacco guideline<br>- tobacco screening guideline<br>- smoking guideline<br>- smoking screening guideline                | n/a                                 | n/a                             | - tobacco<br>- smoking           | - tobacco<br>- smoking           | Manually reviewed by year of publication | Manually reviewed by current recs: mental health conditions and substance abuse     | - tobacco<br>- smoking                                | Manually reviewed by list of current guidelines | Manually reviewed by 'other' category              |

| Topic                                                            | Resource & Search Terms Used                                                                                                                                                    |                                     |                                 |                               |                               |                                          |                                                                                 |                                              |                                                 |                                       |
|------------------------------------------------------------------|---------------------------------------------------------------------------------------------------------------------------------------------------------------------------------|-------------------------------------|---------------------------------|-------------------------------|-------------------------------|------------------------------------------|---------------------------------------------------------------------------------|----------------------------------------------|-------------------------------------------------|---------------------------------------|
|                                                                  | Internet: Google<br><br>(First 3 pages of results reviewed for each search string)                                                                                              | Topic Specific                      |                                 | CPG Databases                 |                               | Key CPG Developers                       |                                                                                 |                                              |                                                 |                                       |
|                                                                  |                                                                                                                                                                                 | Ontario Health: Cancer Care Ontario | CPAC Cancer Guidelines Database | ECRI Guidelines Trust         | CMA CPG Infobase              | CTFPHC                                   | USPSTF                                                                          | NICE                                         | SIGN                                            | TOP Alberta                           |
| Screening for diet                                               | - healthy eating guideline<br>- healthy eating clinical practice guideline<br>- diet clinical practice guideline                                                                | n/a                                 | n/a                             | - healthy eating<br>- diet    | - healthy eating<br>- diet    | Manually reviewed by year of publication | - healthy eating<br>- diet                                                      | - healthy eating<br>- diet                   | Manually reviewed by list of current guidelines | Manually reviewed by 'other' category |
| Screening for physical activity                                  | - physical activity guideline<br>- exercise guideline                                                                                                                           | n/a                                 | n/a                             | - physical activity           | - physical activity           | Manually reviewed by year of publication | - physical activity                                                             | - physical activity                          | Manually reviewed by list of current guidelines | Manually reviewed by 'other' category |
| Screening for vaping / e-cigarette use                           | - vaping guideline<br>- e-cigarette guideline                                                                                                                                   | n/a                                 | n/a                             | - vaping<br>- e-cigarette     | - vaping<br>- e-cigarette     | Manually reviewed by year of publication | Manually reviewed by current recs: mental health conditions and substance abuse | - vaping<br>- e-cigarette                    | Manually reviewed by list of current guidelines | Manually reviewed by 'other' category |
| Screening for cannabis use                                       | - cannabis screening guideline<br>- cannabis guideline<br>- marijuana screening guideline<br>- marijuana guideline                                                              | n/a                                 | n/a                             | - cannabis<br>- marijuana     | - cannabis<br>- marijuana     | Manually reviewed by year of publication | Manually reviewed by current recs: mental health conditions and substance abuse | - cannabis<br>- marijuana                    | Manually reviewed by list of current guidelines | Manually reviewed by 'other' category |
| Screening for drug use                                           | - drug use guideline<br>- substance use guideline                                                                                                                               | n/a                                 | n/a                             | - drug use<br>- substance use | - drug use<br>- substance use | Manually reviewed by year of publication | Manually reviewed by current recs: mental health conditions and substance abuse | - drug<br>- substance                        | Manually reviewed by list of current guidelines | Manually reviewed by 'other' category |
| Screening for lifestyle factors in primary care (general search) | - chronic disease prevention guideline<br>- preventive screening guideline<br>- preventive health guideline<br>- lifestyle disease guideline<br>- lifestyle screening guideline | n/a                                 | n/a                             | - lifestyle                   | - lifestyle                   | Manually reviewed by year of publication | - screening                                                                     | Manually reviewed by lifestyle and wellbeing | Manually reviewed by list of current guidelines | Manually reviewed by 'other' category |

CPAC = Canadian Partnership Against Cancer; CMA CPG = Canadian Medical Association Clinical Practice Guidelines Infobase; CTFPHC = Canadian Task Force on Preventive Health Care; NICE = National Institute for Health and Care Excellence; SIGN = Scottish Intercollegiate Guidelines Network; TOP = Toward Optimized Practice; and USPSTF = U.S. Preventive Services Task Force.

## Appendix 2 – Summary of Search Results

| Topic                                                                 | Phase 1: Literature Search |                |          |               |         |                    |        |      |      |             | Phase 1: Search Results Title/Abstract Review | Phase 2: Full Text Review and Initial Quality Appraisal | Phase 3: Full AGREE II Appraisal - Final Included CPGs | Additional CPGs with Relevant Recs Identified in Other Topics | Total CPGs Included Per Topic<br><i>Note: Some CPGs included in more than one topic</i> |
|-----------------------------------------------------------------------|----------------------------|----------------|----------|---------------|---------|--------------------|--------|------|------|-------------|-----------------------------------------------|---------------------------------------------------------|--------------------------------------------------------|---------------------------------------------------------------|-----------------------------------------------------------------------------------------|
|                                                                       | Internet                   | Topic-Specific |          | CPG Databases |         | Key CPG Developers |        |      |      |             |                                               |                                                         |                                                        |                                                               |                                                                                         |
|                                                                       |                            | OH: CCO        | CPAC CGD | ECRI          | CMA CPG | CTFPHC             | USPSTF | NICE | SIGN | TOP Alberta |                                               |                                                         |                                                        |                                                               |                                                                                         |
| Cervical cancer screening                                             | 90                         | 18             | 27       | 51            | 15      | 13                 | 15     | 24   | 21   | 4           | 278                                           | 6                                                       | 2                                                      |                                                               | 2                                                                                       |
| Colorectal cancer screening                                           | 90                         | 47             | 86       | 41            | 27      | 13                 | 15     | 24   | 21   | 4           | 368                                           | 31                                                      | 5                                                      |                                                               | 5                                                                                       |
| Prostate cancer screening                                             | 90                         | 47             | 56       | 40            | 30      | 13                 | 15     | 24   | 21   | 4           | 340                                           | 18                                                      | 3                                                      |                                                               | 3                                                                                       |
| Breast cancer screening                                               | 90                         | 23             | 87       | 93            | 35      | 13                 | 15     | 24   | 21   | 4           | 405                                           | 17                                                      | 3                                                      |                                                               | 3                                                                                       |
| Lung cancer screening                                                 | 90                         | 62             | 67       | 64            | 26      | 13                 | 15     | 24   | 21   | 4           | 386                                           | 28                                                      | 2                                                      |                                                               | 2                                                                                       |
| Type 2 diabetes                                                       | 60                         | n/a            | n/a      | 133           | 76      | 13                 | 23     | 11   | 21   | 11          | 348                                           | 15                                                      | 4                                                      |                                                               | 4                                                                                       |
| Cardiovascular disease                                                | 90                         | n/a            | n/a      | 120           | 21      | 13                 | 22     | 13   | 21   | 1           | 301                                           | 16                                                      | 3                                                      |                                                               | 3                                                                                       |
| Obesity                                                               | 30                         | n/a            | n/a      | 98            | 61      | 13                 | 23     | 11   | 21   | 16          | 273                                           | 5                                                       | 3                                                      |                                                               | 3                                                                                       |
| Depression screening                                                  | 120                        | n/a            | n/a      | 82            | 21      | 13                 | 16     | 3    | 21   | 16          | 292                                           | 8                                                       | 0                                                      |                                                               | 0                                                                                       |
| Osteoporosis / bone density                                           | 60                         | n/a            | n/a      | 43            | 19      | 13                 | 5      | 3    | 21   | 16          | 180                                           | 14                                                      | 6                                                      |                                                               | 6                                                                                       |
| COPD                                                                  | 60                         | n/a            | n/a      | 30            | 18      | 13                 | 102    | 10   | 21   | 2           | 256                                           | 10                                                      | 3                                                      |                                                               | 3                                                                                       |
| Hepatitis C                                                           | 120                        | n/a            | n/a      | 27            | 25      | 13                 | 22     | 19   | 21   | 11          | 258                                           | 10                                                      | 4                                                      |                                                               | 4                                                                                       |
| Screening for alcohol use                                             | 90                         | n/a            | n/a      | 75            | 22      | 13                 | 12     | 2    | 21   | 16          | 251                                           | 7                                                       | 3                                                      | 2                                                             | 5                                                                                       |
| Screening for tobacco use                                             | 120                        | n/a            | n/a      | 120           | 22      | 13                 | 12     | 8    | 21   | 16          | 332                                           | 12                                                      | 2                                                      | 4                                                             | 6                                                                                       |
| Screening for diet                                                    | 90                         | n/a            | n/a      | 91            | 19      | 13                 | 131    | 4    | 21   | 16          | 385                                           | 6                                                       | 1                                                      | 6                                                             | 7                                                                                       |
| Screening for physical activity                                       | 60                         | n/a            | n/a      | 138           | 11      | 13                 | 102    | 1    | 21   | 16          | 362                                           | 6                                                       | 3                                                      | 6                                                             | 9                                                                                       |
| Screening for vaping / e-cigarette use                                | 60                         | n/a            | n/a      | 10            | 4       | 13                 | 12     | 0    | 21   | 16          | 136                                           | 10                                                      | 0                                                      |                                                               | 0                                                                                       |
| Screening for cannabis use                                            | 120                        | n/a            | n/a      | 12            | 21      | 13                 | 12     | 1    | 21   | 16          | 216                                           | 10                                                      | 1                                                      |                                                               | 1                                                                                       |
| Screening for drug use                                                | 60                         | n/a            | n/a      | 44            | 48      | 13                 | 12     | 11   | 21   | 16          | 225                                           | 11                                                      | 3                                                      |                                                               | 3                                                                                       |
| Screening for lifestyle factors in primary care (supplemental search) | 150                        | n/a            | n/a      | 93            | 12      | 13                 | 129    | 12   | 21   | 16          | 446                                           | 3                                                       | 0                                                      | n/a                                                           | n/a                                                                                     |
| <b>Total</b>                                                          | 1740                       | 197            | 323      | 1405          | 533     | 260                | 710    | 229  | 420  | 221         | 6038                                          | 243                                                     | 51                                                     |                                                               |                                                                                         |

CMA CPG = Canadian Medical Association Clinical Practice Guidelines Infobase; CPAC CGD = Canadian Partnership Against Cancer’s Cancer Guideline Database; CTFPHC = Canadian Task Force on Preventive Health Care; NICE = National Institute for Health and Care Excellence; OH: CCO = Ontario Health: Cancer Care Ontario; SIGN = Scottish Intercollegiate Guidelines Network; TOP = Toward Optimized Practice; and USPSTF = U.S. Preventive Services Task Force.
