# Supplementary material for: Harmonization of clinical practice guidelines for primary prevention and screening: actionable recommendations and resources for primary care
Source: Springer Nature journal article supplement (doi:10.1186/s12875-024-02388-3), 2024-05-06
Supplement: MOESM2 [file 12875_2024_2388_MOESM2_ESM.pdf]

## Appendix 2 – Summary of Search Results

| Topic                                                                 | Phase 1: Literature Search |                |          |               |         |                    |        |      |      |             | Phase 1: Search Results Title/Abstract Review | Phase 2: Full Text Review and Initial Quality Appraisal | Phase 3: Full AGREE II Appraisal - Final Included CPGs | Additional CPGs with Relevant Recs Identified in Other Topics | Total CPGs Included Per Topic<br><i>Note: Some CPGs included in more than one topic</i> |
|-----------------------------------------------------------------------|----------------------------|----------------|----------|---------------|---------|--------------------|--------|------|------|-------------|-----------------------------------------------|---------------------------------------------------------|--------------------------------------------------------|---------------------------------------------------------------|-----------------------------------------------------------------------------------------|
|                                                                       | Internet                   | Topic-Specific |          | CPG Databases |         | Key CPG Developers |        |      |      |             |                                               |                                                         |                                                        |                                                               |                                                                                         |
|                                                                       |                            | OH: CCO        | CPAC CGD | ECRI          | CMA CPG | CTFPHC             | USPSTF | NICE | SIGN | TOP Alberta |                                               |                                                         |                                                        |                                                               |                                                                                         |
| Cervical cancer screening                                             | 90                         | 18             | 27       | 51            | 15      | 13                 | 15     | 24   | 21   | 4           | 278                                           | 6                                                       | 2                                                      |                                                               | 2                                                                                       |
| Colorectal cancer screening                                           | 90                         | 47             | 86       | 41            | 27      | 13                 | 15     | 24   | 21   | 4           | 368                                           | 31                                                      | 5                                                      |                                                               | 5                                                                                       |
| Prostate cancer screening                                             | 90                         | 47             | 56       | 40            | 30      | 13                 | 15     | 24   | 21   | 4           | 340                                           | 18                                                      | 3                                                      |                                                               | 3                                                                                       |
| Breast cancer screening                                               | 90                         | 23             | 87       | 93            | 35      | 13                 | 15     | 24   | 21   | 4           | 405                                           | 17                                                      | 3                                                      |                                                               | 3                                                                                       |
| Lung cancer screening                                                 | 90                         | 62             | 67       | 64            | 26      | 13                 | 15     | 24   | 21   | 4           | 386                                           | 28                                                      | 2                                                      |                                                               | 2                                                                                       |
| Type 2 diabetes                                                       | 60                         | n/a            | n/a      | 133           | 76      | 13                 | 23     | 11   | 21   | 11          | 348                                           | 15                                                      | 4                                                      |                                                               | 4                                                                                       |
| Cardiovascular disease                                                | 90                         | n/a            | n/a      | 120           | 21      | 13                 | 22     | 13   | 21   | 1           | 301                                           | 16                                                      | 3                                                      |                                                               | 3                                                                                       |
| Obesity                                                               | 30                         | n/a            | n/a      | 98            | 61      | 13                 | 23     | 11   | 21   | 16          | 273                                           | 5                                                       | 3                                                      |                                                               | 3                                                                                       |
| Depression screening                                                  | 120                        | n/a            | n/a      | 82            | 21      | 13                 | 16     | 3    | 21   | 16          | 292                                           | 8                                                       | 0                                                      |                                                               | 0                                                                                       |
| Osteoporosis / bone density                                           | 60                         | n/a            | n/a      | 43            | 19      | 13                 | 5      | 3    | 21   | 16          | 180                                           | 14                                                      | 6                                                      |                                                               | 6                                                                                       |
| COPD                                                                  | 60                         | n/a            | n/a      | 30            | 18      | 13                 | 102    | 10   | 21   | 2           | 256                                           | 10                                                      | 3                                                      |                                                               | 3                                                                                       |
| Hepatitis C                                                           | 120                        | n/a            | n/a      | 27            | 25      | 13                 | 22     | 19   | 21   | 11          | 258                                           | 10                                                      | 4                                                      |                                                               | 4                                                                                       |
| Screening for alcohol use                                             | 90                         | n/a            | n/a      | 75            | 22      | 13                 | 12     | 2    | 21   | 16          | 251                                           | 7                                                       | 3                                                      | 2                                                             | 5                                                                                       |
| Screening for tobacco use                                             | 120                        | n/a            | n/a      | 120           | 22      | 13                 | 12     | 8    | 21   | 16          | 332                                           | 12                                                      | 2                                                      | 4                                                             | 6                                                                                       |
| Screening for diet                                                    | 90                         | n/a            | n/a      | 91            | 19      | 13                 | 131    | 4    | 21   | 16          | 385                                           | 6                                                       | 1                                                      | 6                                                             | 7                                                                                       |
| Screening for physical activity                                       | 60                         | n/a            | n/a      | 138           | 11      | 13                 | 102    | 1    | 21   | 16          | 362                                           | 6                                                       | 3                                                      | 6                                                             | 9                                                                                       |
| Screening for vaping / e-cigarette use                                | 60                         | n/a            | n/a      | 10            | 4       | 13                 | 12     | 0    | 21   | 16          | 136                                           | 10                                                      | 0                                                      |                                                               | 0                                                                                       |
| Screening for cannabis use                                            | 120                        | n/a            | n/a      | 12            | 21      | 13                 | 12     | 1    | 21   | 16          | 216                                           | 10                                                      | 1                                                      |                                                               | 1                                                                                       |
| Screening for drug use                                                | 60                         | n/a            | n/a      | 44            | 48      | 13                 | 12     | 11   | 21   | 16          | 225                                           | 11                                                      | 3                                                      |                                                               | 3                                                                                       |
| Screening for lifestyle factors in primary care (supplemental search) | 150                        | n/a            | n/a      | 93            | 12      | 13                 | 129    | 12   | 21   | 16          | 446                                           | 3                                                       | 0                                                      | n/a                                                           | n/a                                                                                     |
| <b>Total</b>                                                          | 1740                       | 197            | 323      | 1405          | 533     | 260                | 710    | 229  | 420  | 221         | 6038                                          | 243                                                     | 51                                                     |                                                               |                                                                                         |

CMA CPG = Canadian Medical Association Clinical Practice Guidelines Infobase; CPAC CGD = Canadian Partnership Against Cancer’s Cancer Guideline Database; CTFPHC = Canadian Task Force on Preventive Health Care; NICE = National Institute for Health and Care Excellence; OH: CCO = Ontario Health: Cancer Care Ontario; SIGN = Scottish Intercollegiate Guidelines Network; TOP = Toward Optimized Practice; and USPSTF = U.S. Preventive Services Task Force.
