# Supplementary material for: Harmonization of clinical practice guidelines for primary prevention and screening: actionable recommendations and resources for primary care
Source: BMC Prim Care. 2024 May 6;25:153. doi: 10.1186/s12875-024-02388-3 (PMC11071261; doi:10.1186/s12875-024-02388-3)
Supplement: Supplementary file 3 — Additional file 3: Appendix 3. Full AGREE II scores per clinical practice guideline (by topic area). [file 12875_2024_2388_MOESM3_ESM.xlsx]

## Sheet: Sheet1
Appendix 3 - Full AGREE II scores per clinical practice guideline (by topic area)
	ALCOHOL USE
Department of Veterans Affairs / Department of Defense. VA/DoD Clinical Practice Guideline for the Management of Substance Use Disorders Version 4.0. 2021. Available from: https://www.healthquality.va.gov/guidelines/mh/sud/						U.S. Preventive Services Task Force (USPSTF). Unhealthy Alcohol Use in Adolescents and Adults: Screening and Behavioral Counseling Interventions. 2018. Available from: https://www.uspreventiveservicestaskforce.org/uspstf/recommendation/unhealthy-alcohol-use-in-adolescents-and-adults-screening-and-behavioral-counseling-interventions						Hypertension Canada. Hypertension Canada’s 2020 Comprehensive Guidelines for the Prevention, Diagnosis, Risk Assessment, and Treatment of Hypertension in Adults and Children. 2020. Available from: https://www.onlinecjc.ca/article/S0828-282X(20)30191-4/fulltext						Institute for Clinical Systems Improvement (ICSI). Diagnosis and Treatment of Osteoporosis. 2017. Available from: https://www.icsi.org/guideline/osteoporosis/						British Columbia Centre on Substance Use (BCCSU). Provincial Guideline for the Clinical Management of High-Risk Drinking and Alcohol Use Disorder. 2019. Available from: https://www.bccsu.ca/alcohol-use-disorder/
	Item	Score					Item	Score					Item	Score					Item	Score					Item	Score
	Domain 1 - Scope and Purpose						Domain 1 - Scope and Purpose						Domain 1 - Scope and Purpose						Domain 1 - Scope and Purpose						Domain 1 - Scope and Purpose
	Q1 - The overall objective(s) of the guideline is (are) specifically described.	7					Q1 - The overall objective(s) of the guideline is (are) specifically described.	7					Q1 - The overall objective(s) of the guideline is (are) specifically described.	6					Q1 - The overall objective(s) of the guideline is (are) specifically described.	7					Q1 - The overall objective(s) of the guideline is (are) specifically described.	7
	Q2 - The health question(s) covered by the guideline is (are) specifically described.	7					Q2 - The health question(s) covered by the guideline is (are) specifically described.	6					Q2 - The health question(s) covered by the guideline is (are) specifically described.	3					Q2 - The health question(s) covered by the guideline is (are) specifically described.	6					Q2 - The health question(s) covered by the guideline is (are) specifically described.	6
	Q3 - The population (patients, public, etc.) to whom the guideline is meant to apply is specifically described.	7					Q3 - The population (patients, public, etc.) to whom the guideline is meant to apply is specifically described.	6					Q3 - The population (patients, public, etc.) to whom the guideline is meant to apply is specifically described.	4					Q3 - The population (patients, public, etc.) to whom the guideline is meant to apply is specifically described.	7					Q3 - The population (patients, public, etc.) to whom the guideline is meant to apply is specifically described.	6
	Domain 2 - Stakeholder Involvement						Domain 2 - Stakeholder Involvement						Domain 2 - Stakeholder Involvement						Domain 2 - Stakeholder Involvement						Domain 2 - Stakeholder Involvement
	Q4 - The guideline development group includes individuals from all relevant professional groups.	7					Q4 - The guideline development group includes individuals from all relevant professional groups.	6					Q4 - The guideline development group includes individuals from all relevant professional groups.	7					Q4 - The guideline development group includes individuals from all relevant professional groups.	6					Q4 - The guideline development group includes individuals from all relevant professional groups.	7
	Q5 - The views and preferences of the target population (patients, public, etc.) have been sought.	6					Q5 - The views and preferences of the target population (patients, public, etc.) have been sought.	4					Q5 - The views and preferences of the target population (patients, public, etc.) have been sought.	2					Q5 - The views and preferences of the target population (patients, public, etc.) have been sought.	6					Q5 - The views and preferences of the target population (patients, public, etc.) have been sought.	6
	Q6 - The target users of the guideline are clearly defined.	7					Q6 - The target users of the guideline are clearly defined.	4					Q6 - The target users of the guideline are clearly defined.	3					Q6 - The target users of the guideline are clearly defined.	6					Q6 - The target users of the guideline are clearly defined.	6
	Domain 3 - Rigour of Development						Domain 3 - Rigour of Development						Domain 3 - Rigour of Development						Domain 3 - Rigour of Development						Domain 3 - Rigour of Development
	Q7 - Systematic methods were used to search for evidence.	7					Q7 - Systematic methods were used to search for evidence.	7					Q7 - Systematic methods were used to search for evidence.	4					Q7 - Systematic methods were used to search for evidence.	5					Q7 - Systematic methods were used to search for evidence.	6
	Q8 - The criteria for selecting the evidence are clearly described.	7					Q8 - The criteria for selecting the evidence are clearly described.	7					Q8 - The criteria for selecting the evidence are clearly described.	2					Q8 - The criteria for selecting the evidence are clearly described.	4					Q8 - The criteria for selecting the evidence are clearly described.	7
	Q9 - The strengths and limitations of the body of evidence are clearly described.	6					Q9 - The strengths and limitations of the body of evidence are clearly described.	6					Q9 - The strengths and limitations of the body of evidence are clearly described.	5					Q9 - The strengths and limitations of the body of evidence are clearly described.	5					Q9 - The strengths and limitations of the body of evidence are clearly described.	5
	Q10 - The methods for formulating the recommendations are clearly described.	6					Q10 - The methods for formulating the recommendations are clearly described.	6					Q10 - The methods for formulating the recommendations are clearly described.	6					Q10 - The methods for formulating the recommendations are clearly described.	4					Q10 - The methods for formulating the recommendations are clearly described.	6
	Q11 - The health benefits, side effects, and risks have been considered in formulating the recommendations.	6					Q11 - The health benefits, side effects, and risks have been considered in formulating the recommendations.	7					Q11 - The health benefits, side effects, and risks have been considered in formulating the recommendations.	5					Q11 - The health benefits, side effects, and risks have been considered in formulating the recommendations.	7					Q11 - The health benefits, side effects, and risks have been considered in formulating the recommendations.	5
	Q12 - There is an explicit link between the recommendations and the supporting evidence.	6					Q12 - There is an explicit link between the recommendations and the supporting evidence.	6					Q12 - There is an explicit link between the recommendations and the supporting evidence.	7					Q12 - There is an explicit link between the recommendations and the supporting evidence.	5					Q12 - There is an explicit link between the recommendations and the supporting evidence.	5
	Q13 - The guideline has been externally reviewed by experts prior to its publication.	6					Q13 - The guideline has been externally reviewed by experts prior to its publication.	4					Q13 - The guideline has been externally reviewed by experts prior to its publication.	2					Q13 - The guideline has been externally reviewed by experts prior to its publication.	6					Q13 - The guideline has been externally reviewed by experts prior to its publication.	6
	Q14 - A procedure for updating the guideline is provided.	6					Q14 - A procedure for updating the guideline is provided.	5					Q14 - A procedure for updating the guideline is provided.	6					Q14 - A procedure for updating the guideline is provided.	6					Q14 - A procedure for updating the guideline is provided.	7
	Domain 4 - Clarity of Presentation						Domain 4 - Clarity of Presentation						Domain 4 - Clarity of Presentation						Domain 4 - Clarity of Presentation						Domain 4 - Clarity of Presentation
	Q15 - The recommendations are specific and unambiguous.	7					Q15 - The recommendations are specific and unambiguous.	7					Q15 - The recommendations are specific and unambiguous.	7					Q15 - The recommendations are specific and unambiguous.	6					Q15 - The recommendations are specific and unambiguous.	6
	Q16 - The different options for management of the condition or health issue are clearly presented.	7					Q16 - The different options for management of the condition or health issue are clearly presented.	6					Q16 - The different options for management of the condition or health issue are clearly presented.	7					Q16 - The different options for management of the condition or health issue are clearly presented.	6					Q16 - The different options for management of the condition or health issue are clearly presented.	6
	Q17 - Key recommendations are easily identifiable	6					Q17 - Key recommendations are easily identifiable	7					Q17 - Key recommendations are easily identifiable	7					Q17 - Key recommendations are easily identifiable	5					Q17 - Key recommendations are easily identifiable	7
	Domain 5 - Applicability						Domain 5 - Applicability						Domain 5 - Applicability						Domain 5 - Applicability						Domain 5 - Applicability
	Q18 - The guideline describes facilitators and barriers to its application.	5					Q18 - The guideline describes facilitators and barriers to its application.	5					Q18 - The guideline describes facilitators and barriers to its application.	4					Q18 - The guideline describes facilitators and barriers to its application.	4					Q18 - The guideline describes facilitators and barriers to its application.	5
	Q19 - The guideline provides advice and/or tools on how the recommendations can be put into practice.	6					Q19 - The guideline provides advice and/or tools on how the recommendations can be put into practice.	4					Q19 - The guideline provides advice and/or tools on how the recommendations can be put into practice.	6					Q19 - The guideline provides advice and/or tools on how the recommendations can be put into practice.	7					Q19 - The guideline provides advice and/or tools on how the recommendations can be put into practice.	6
	Q20 - The potential resource implications of applying the recommendations have been considered.	4					Q20 - The potential resource implications of applying the recommendations have been considered.	3					Q20 - The potential resource implications of applying the recommendations have been considered.	2					Q20 - The potential resource implications of applying the recommendations have been considered.	5					Q20 - The potential resource implications of applying the recommendations have been considered.	3
	Q21 - The guideline presents monitoring and/or auditing criteria.	4					Q21 - The guideline presents monitoring and/or auditing criteria.	3					Q21 - The guideline presents monitoring and/or auditing criteria.	2					Q21 - The guideline presents monitoring and/or auditing criteria.	7					Q21 - The guideline presents monitoring and/or auditing criteria.	2
	Domain 6 - Editorial Independence						Domain 6 - Editorial Independence						Domain 6 - Editorial Independence						Domain 6 - Editorial Independence						Domain 6 - Editorial Independence
	Q22 - The views of the funding body have not influenced the content of the guideline.	4					Q22 - The views of the funding body have not influenced the content of the guideline.	7					Q22 - The views of the funding body have not influenced the content of the guideline.	6					Q22 - The views of the funding body have not influenced the content of the guideline.	7					Q22 - The views of the funding body have not influenced the content of the guideline.	6
	Q23 - Competing interests of guideline development group members have been recorded and addressed.	6					Q23 - Competing interests of guideline development group members have been recorded and addressed.	6					Q23 - Competing interests of guideline development group members have been recorded and addressed.	5					Q23 - Competing interests of guideline development group members have been recorded and addressed.	6					Q23 - Competing interests of guideline development group members have been recorded and addressed.	7
	Overall Guideline Assessment						Overall Guideline Assessment						Overall Guideline Assessment						Overall Guideline Assessment						Overall Guideline Assessment
	Overall quality of this guideline	6					Overall quality of this guideline	6					Overall quality of this guideline	4					Overall quality of this guideline	6					Overall quality of this guideline	6
BREAST CANCER
Canadian Task Force on Preventive Health Care. Recommendations on Screening for Breast Cancer in Women Aged 40–74 Years Who are not at Increased Risk for Breast Cancer. 2018. Available from: https://canadiantaskforce.ca/guidelines/published-guidelines/breast-cancer-update/						Brazilian Ministry of Health. Guidelines for Early Detection of Breast Cancer in Brazil II – New National Recommendations, Main Evidence, and Controversies. 2018. Available from: https://www.scielo.br/j/csp/a/8gGyb5s9Nt3nSsw5GFnnPQb/?lang=en						Japanese Research Group for the Development of Breast Cancer Screening Guidelines. 2016 The Japanese Guidelines for Breast Cancer Screening. Available from: https://academic.oup.com/jjco/article/46/5/482/2218841
	Item	Score					Item	Score					Item	Score
	Domain 1 - Scope and Purpose						Domain 1 - Scope and Purpose						Domain 1 - Scope and Purpose
	Q1 - The overall objective(s) of the guideline is (are) specifically described.	6					Q1 - The overall objective(s) of the guideline is (are) specifically described.	6					Q1 - The overall objective(s) of the guideline is (are) specifically described.	7
	Q2 - The health question(s) covered by the guideline is (are) specifically described.	6					Q2 - The health question(s) covered by the guideline is (are) specifically described.	7					Q2 - The health question(s) covered by the guideline is (are) specifically described.	6
	Q3 - The population (patients, public, etc.) to whom the guideline is meant to apply is specifically described.	7					Q3 - The population (patients, public, etc.) to whom the guideline is meant to apply is specifically described.	7					Q3 - The population (patients, public, etc.) to whom the guideline is meant to apply is specifically described.	6
	Domain 2 - Stakeholder Involvement						Domain 2 - Stakeholder Involvement						Domain 2 - Stakeholder Involvement
	Q4 - The guideline development group includes individuals from all relevant professional groups.	5					Q4 - The guideline development group includes individuals from all relevant professional groups.	3					Q4 - The guideline development group includes individuals from all relevant professional groups.	5
	Q5 - The views and preferences of the target population (patients, public, etc.) have been sought.	6					Q5 - The views and preferences of the target population (patients, public, etc.) have been sought.	2					Q5 - The views and preferences of the target population (patients, public, etc.) have been sought.	1
	Q6 - The target users of the guideline are clearly defined.	6					Q6 - The target users of the guideline are clearly defined.	4					Q6 - The target users of the guideline are clearly defined.	5
	Domain 3 - Rigour of Development						Domain 3 - Rigour of Development						Domain 3 - Rigour of Development
	Q7 - Systematic methods were used to search for evidence.	7					Q7 - Systematic methods were used to search for evidence.	7					Q7 - Systematic methods were used to search for evidence.	6
	Q8 - The criteria for selecting the evidence are clearly described.	7					Q8 - The criteria for selecting the evidence are clearly described.	6					Q8 - The criteria for selecting the evidence are clearly described.	6
	Q9 - The strengths and limitations of the body of evidence are clearly described.	7					Q9 - The strengths and limitations of the body of evidence are clearly described.	6					Q9 - The strengths and limitations of the body of evidence are clearly described.	6
	Q10 - The methods for formulating the recommendations are clearly described.	5					Q10 - The methods for formulating the recommendations are clearly described.	4					Q10 - The methods for formulating the recommendations are clearly described.	4
	Q11 - The health benefits, side effects, and risks have been considered in formulating the recommendations.	7					Q11 - The health benefits, side effects, and risks have been considered in formulating the recommendations.	6					Q11 - The health benefits, side effects, and risks have been considered in formulating the recommendations.	7
	Q12 - There is an explicit link between the recommendations and the supporting evidence.	6					Q12 - There is an explicit link between the recommendations and the supporting evidence.	5					Q12 - There is an explicit link between the recommendations and the supporting evidence.	6
	Q13 - The guideline has been externally reviewed by experts prior to its publication.	5					Q13 - The guideline has been externally reviewed by experts prior to its publication.	2					Q13 - The guideline has been externally reviewed by experts prior to its publication.	4
	Q14 - A procedure for updating the guideline is provided.	5					Q14 - A procedure for updating the guideline is provided.	1					Q14 - A procedure for updating the guideline is provided.	5
	Domain 4 - Clarity of Presentation						Domain 4 - Clarity of Presentation						Domain 4 - Clarity of Presentation
	Q15 - The recommendations are specific and unambiguous.	7					Q15 - The recommendations are specific and unambiguous.	7					Q15 - The recommendations are specific and unambiguous.	6
	Q16 - The different options for management of the condition or health issue are clearly presented.	6					Q16 - The different options for management of the condition or health issue are clearly presented.	6					Q16 - The different options for management of the condition or health issue are clearly presented.	5
	Q17 - Key recommendations are easily identifiable	7					Q17 - Key recommendations are easily identifiable	6					Q17 - Key recommendations are easily identifiable	6
	Domain 5 - Applicability						Domain 5 - Applicability						Domain 5 - Applicability
	Q18 - The guideline describes facilitators and barriers to its application.	4					Q18 - The guideline describes facilitators and barriers to its application.	6					Q18 - The guideline describes facilitators and barriers to its application.	2
	Q19 - The guideline provides advice and/or tools on how the recommendations can be put into practice.	5					Q19 - The guideline provides advice and/or tools on how the recommendations can be put into practice.	5					Q19 - The guideline provides advice and/or tools on how the recommendations can be put into practice.	1
	Q20 - The potential resource implications of applying the recommendations have been considered.	3					Q20 - The potential resource implications of applying the recommendations have been considered.	4					Q20 - The potential resource implications of applying the recommendations have been considered.	2
	Q21 - The guideline presents monitoring and/or auditing criteria.	5					Q21 - The guideline presents monitoring and/or auditing criteria.	2					Q21 - The guideline presents monitoring and/or auditing criteria.	2
	Domain 6 - Editorial Independence						Domain 6 - Editorial Independence						Domain 6 - Editorial Independence
	Q22 - The views of the funding body have not influenced the content of the guideline.	7					Q22 - The views of the funding body have not influenced the content of the guideline.	5					Q22 - The views of the funding body have not influenced the content of the guideline.	5
	Q23 - Competing interests of guideline development group members have been recorded and addressed.	5					Q23 - Competing interests of guideline development group members have been recorded and addressed.	2					Q23 - Competing interests of guideline development group members have been recorded and addressed.	2
	Overall Guideline Assessment						Overall Guideline Assessment						Overall Guideline Assessment
	Overall quality of this guideline	6					Overall quality of this guideline	4					Overall quality of this guideline	5
	CANNABIS USE
Fischer, B et al. Lower-risk Cannabis Use Guidelines (LRCUG) for Reducing Health Harms From Non-Medical Cannabis Use: A Comprehensive Evidence and Recommendations Update. 2021. Available from: https://www.ncbi.nlm.nih.gov/pmc/articles/PMC5508136/
	Item	Score
	Domain 1 - Scope and Purpose
	Q1 - The overall objective(s) of the guideline is (are) specifically described.	5
	Q2 - The health question(s) covered by the guideline is (are) specifically described.	5
	Q3 - The population (patients, public, etc.) to whom the guideline is meant to apply is specifically described.	5
	Domain 2 - Stakeholder Involvement
	Q4 - The guideline development group includes individuals from all relevant professional groups.	1
	Q5 - The views and preferences of the target population (patients, public, etc.) have been sought.	2
	Q6 - The target users of the guideline are clearly defined.	3
	Domain 3 - Rigour of Development
	Q7 - Systematic methods were used to search for evidence.	6
	Q8 - The criteria for selecting the evidence are clearly described.	5
	Q9 - The strengths and limitations of the body of evidence are clearly described.	6
	Q10 - The methods for formulating the recommendations are clearly described.	4
	Q11 - The health benefits, side effects, and risks have been considered in formulating the recommendations.	5
	Q12 - There is an explicit link between the recommendations and the supporting evidence.	5
	Q13 - The guideline has been externally reviewed by experts prior to its publication.	2
	Q14 - A procedure for updating the guideline is provided.	1
	Domain 4 - Clarity of Presentation
	Q15 - The recommendations are specific and unambiguous.	6
	Q16 - The different options for management of the condition or health issue are clearly presented.	4
	Q17 - Key recommendations are easily identifiable	6
	Domain 5 - Applicability
	Q18 - The guideline describes facilitators and barriers to its application.	3
	Q19 - The guideline provides advice and/or tools on how the recommendations can be put into practice.	3
	Q20 - The potential resource implications of applying the recommendations have been considered.	2
	Q21 - The guideline presents monitoring and/or auditing criteria.	2
	Domain 6 - Editorial Independence
	Q22 - The views of the funding body have not influenced the content of the guideline.	3
	Q23 - Competing interests of guideline development group members have been recorded and addressed.	6
	Overall Guideline Assessment
	Overall quality of this guideline	4
	CARDIOVASCULAR DISEASE
American College of Cardiology/American Heart Association Task Force on Clinical Practice Guidelines. 2019 ACC/AHA Guideline on the Primary Prevention of Cardiovascular Disease. J Am Coll Cardiol 2019 Sep 74(10) pp e177-e232. Available from: https://www.jacc.org/doi/10.1016/j.jacc.2019.03.010						Department of Veterans Affairs / Department of Defense. VA/DoD Clinical Practice Guideline for the Management of Dyslipidemia for Cardiovascular Risk Reduction (Lipids). 2020. Available from: https://www.healthquality.va.gov/guidelines/CD/lipids/						Hypertension Canada. Hypertension Canada’s 2020 Comprehensive Guidelines for the Prevention, Diagnosis, Risk Assessment, and Treatment of Hypertension in Adults and Children. 2020. Available from: https://www.onlinecjc.ca/article/S0828-282X(20)30191-4/fulltext
	Item	Score					Item	Score					Item	Score
	Domain 1 - Scope and Purpose						Domain 1 - Scope and Purpose						Domain 1 - Scope and Purpose
	Q1 - The overall objective(s) of the guideline is (are) specifically described.	6					Q1 - The overall objective(s) of the guideline is (are) specifically described.	7					Q1 - The overall objective(s) of the guideline is (are) specifically described.	6
	Q2 - The health question(s) covered by the guideline is (are) specifically described.	3					Q2 - The health question(s) covered by the guideline is (are) specifically described.	7					Q2 - The health question(s) covered by the guideline is (are) specifically described.	3
	Q3 - The population (patients, public, etc.) to whom the guideline is meant to apply is specifically described.	5					Q3 - The population (patients, public, etc.) to whom the guideline is meant to apply is specifically described.	7					Q3 - The population (patients, public, etc.) to whom the guideline is meant to apply is specifically described.	4
	Domain 2 - Stakeholder Involvement						Domain 2 - Stakeholder Involvement						Domain 2 - Stakeholder Involvement
	Q4 - The guideline development group includes individuals from all relevant professional groups.	7					Q4 - The guideline development group includes individuals from all relevant professional groups.	7					Q4 - The guideline development group includes individuals from all relevant professional groups.	7
	Q5 - The views and preferences of the target population (patients, public, etc.) have been sought.	5					Q5 - The views and preferences of the target population (patients, public, etc.) have been sought.	6					Q5 - The views and preferences of the target population (patients, public, etc.) have been sought.	2
	Q6 - The target users of the guideline are clearly defined.	5					Q6 - The target users of the guideline are clearly defined.	6					Q6 - The target users of the guideline are clearly defined.	3
	Domain 3 - Rigour of Development						Domain 3 - Rigour of Development						Domain 3 - Rigour of Development
	Q7 - Systematic methods were used to search for evidence.	7					Q7 - Systematic methods were used to search for evidence.	7					Q7 - Systematic methods were used to search for evidence.	4
	Q8 - The criteria for selecting the evidence are clearly described.	7					Q8 - The criteria for selecting the evidence are clearly described.	7					Q8 - The criteria for selecting the evidence are clearly described.	2
	Q9 - The strengths and limitations of the body of evidence are clearly described.	5					Q9 - The strengths and limitations of the body of evidence are clearly described.	6					Q9 - The strengths and limitations of the body of evidence are clearly described.	5
	Q10 - The methods for formulating the recommendations are clearly described.	5					Q10 - The methods for formulating the recommendations are clearly described.	6					Q10 - The methods for formulating the recommendations are clearly described.	6
	Q11 - The health benefits, side effects, and risks have been considered in formulating the recommendations.	7					Q11 - The health benefits, side effects, and risks have been considered in formulating the recommendations.	6					Q11 - The health benefits, side effects, and risks have been considered in formulating the recommendations.	5
	Q12 - There is an explicit link between the recommendations and the supporting evidence.	7					Q12 - There is an explicit link between the recommendations and the supporting evidence.	7					Q12 - There is an explicit link between the recommendations and the supporting evidence.	7
	Q13 - The guideline has been externally reviewed by experts prior to its publication.	5					Q13 - The guideline has been externally reviewed by experts prior to its publication.	5					Q13 - The guideline has been externally reviewed by experts prior to its publication.	2
	Q14 - A procedure for updating the guideline is provided.	4					Q14 - A procedure for updating the guideline is provided.	4					Q14 - A procedure for updating the guideline is provided.	6
	Domain 4 - Clarity of Presentation						Domain 4 - Clarity of Presentation						Domain 4 - Clarity of Presentation
	Q15 - The recommendations are specific and unambiguous.	7					Q15 - The recommendations are specific and unambiguous.	7					Q15 - The recommendations are specific and unambiguous.	7
	Q16 - The different options for management of the condition or health issue are clearly presented.	7					Q16 - The different options for management of the condition or health issue are clearly presented.	7					Q16 - The different options for management of the condition or health issue are clearly presented.	7
	Q17 - Key recommendations are easily identifiable	7					Q17 - Key recommendations are easily identifiable	6					Q17 - Key recommendations are easily identifiable	7
	Domain 5 - Applicability						Domain 5 - Applicability						Domain 5 - Applicability
	Q18 - The guideline describes facilitators and barriers to its application.	4					Q18 - The guideline describes facilitators and barriers to its application.	5					Q18 - The guideline describes facilitators and barriers to its application.	4
	Q19 - The guideline provides advice and/or tools on how the recommendations can be put into practice.	3					Q19 - The guideline provides advice and/or tools on how the recommendations can be put into practice.	7					Q19 - The guideline provides advice and/or tools on how the recommendations can be put into practice.	6
	Q20 - The potential resource implications of applying the recommendations have been considered.	4					Q20 - The potential resource implications of applying the recommendations have been considered.	5					Q20 - The potential resource implications of applying the recommendations have been considered.	2
	Q21 - The guideline presents monitoring and/or auditing criteria.	2					Q21 - The guideline presents monitoring and/or auditing criteria.	3					Q21 - The guideline presents monitoring and/or auditing criteria.	2
	Domain 6 - Editorial Independence						Domain 6 - Editorial Independence						Domain 6 - Editorial Independence
	Q22 - The views of the funding body have not influenced the content of the guideline.	7					Q22 - The views of the funding body have not influenced the content of the guideline.	1					Q22 - The views of the funding body have not influenced the content of the guideline.	6
	Q23 - Competing interests of guideline development group members have been recorded and addressed.	7					Q23 - Competing interests of guideline development group members have been recorded and addressed.	4					Q23 - Competing interests of guideline development group members have been recorded and addressed.	5
	Overall Guideline Assessment						Overall Guideline Assessment						Overall Guideline Assessment
	Overall quality of this guideline	6					Overall quality of this guideline	5					Overall quality of this guideline	4
	CERVICAL CANCER
Screening for Cervical Cancer: U.S. Preventive Services Task Force Recommendation Statement. 2018. Available from: www.uspreventiveservicestaskforce.org/uspstf/recommendation/cervical-cancer-screening						Cervical Cancer Screening for Individuals at Average Risk: 2020 Guideline Update from the American Cancer Society. Available from: https://doi.org/10.3322/caac.21628
	Item	Score					Item	Score
	Domain 1 - Scope and Purpose						Domain 1 - Scope and Purpose
	Q1 - The overall objective(s) of the guideline is (are) specifically described.	6					Q1 - The overall objective(s) of the guideline is (are) specifically described.	6
	Q2 - The health question(s) covered by the guideline is (are) specifically described.	6					Q2 - The health question(s) covered by the guideline is (are) specifically described.	6
	Q3 - The population (patients, public, etc.) to whom the guideline is meant to apply is specifically described.	6					Q3 - The population (patients, public, etc.) to whom the guideline is meant to apply is specifically described.	6
	Domain 2 - Stakeholder Involvement						Domain 2 - Stakeholder Involvement
	Q4 - The guideline development group includes individuals from all relevant professional groups.	6					Q4 - The guideline development group includes individuals from all relevant professional groups.	5
	Q5 - The views and preferences of the target population (patients, public, etc.) have been sought.	3					Q5 - The views and preferences of the target population (patients, public, etc.) have been sought.	3
	Q6 - The target users of the guideline are clearly defined.	2					Q6 - The target users of the guideline are clearly defined.	3
	Domain 3 - Rigour of Development						Domain 3 - Rigour of Development
	Q7 - Systematic methods were used to search for evidence.	7					Q7 - Systematic methods were used to search for evidence.	5
	Q8 - The criteria for selecting the evidence are clearly described.	7					Q8 - The criteria for selecting the evidence are clearly described.	5
	Q9 - The strengths and limitations of the body of evidence are clearly described.	6					Q9 - The strengths and limitations of the body of evidence are clearly described.	5
	Q10 - The methods for formulating the recommendations are clearly described.	7					Q10 - The methods for formulating the recommendations are clearly described.	5
	Q11 - The health benefits, side effects, and risks have been considered in formulating the recommendations.	6					Q11 - The health benefits, side effects, and risks have been considered in formulating the recommendations.	6
	Q12 - There is an explicit link between the recommendations and the supporting evidence.	6					Q12 - There is an explicit link between the recommendations and the supporting evidence.	5
	Q13 - The guideline has been externally reviewed by experts prior to its publication.	5					Q13 - The guideline has been externally reviewed by experts prior to its publication.	3
	Q14 - A procedure for updating the guideline is provided.	6					Q14 - A procedure for updating the guideline is provided.	5
	Domain 4 - Clarity of Presentation						Domain 4 - Clarity of Presentation
	Q15 - The recommendations are specific and unambiguous.	6					Q15 - The recommendations are specific and unambiguous.	6
	Q16 - The different options for management of the condition or health issue are clearly presented.	6					Q16 - The different options for management of the condition or health issue are clearly presented.	6
	Q17 - Key recommendations are easily identifiable	7					Q17 - Key recommendations are easily identifiable	6
	Domain 5 - Applicability						Domain 5 - Applicability
	Q18 - The guideline describes facilitators and barriers to its application.	5					Q18 - The guideline describes facilitators and barriers to its application.	2
	Q19 - The guideline provides advice and/or tools on how the recommendations can be put into practice.	6					Q19 - The guideline provides advice and/or tools on how the recommendations can be put into practice.	2
	Q20 - The potential resource implications of applying the recommendations have been considered.	3					Q20 - The potential resource implications of applying the recommendations have been considered.	3
	Q21 - The guideline presents monitoring and/or auditing criteria.	3					Q21 - The guideline presents monitoring and/or auditing criteria.	2
	Domain 6 - Editorial Independence						Domain 6 - Editorial Independence
	Q22 - The views of the funding body have not influenced the content of the guideline.	6					Q22 - The views of the funding body have not influenced the content of the guideline.	5
	Q23 - Competing interests of guideline development group members have been recorded and addressed.	5					Q23 - Competing interests of guideline development group members have been recorded and addressed.	6
	Overall Guideline Assessment						Overall Guideline Assessment
	Overall quality of this guideline	6					Overall quality of this guideline	5
	CHRONIC OBSTRUCTIVE PULMONARY DISEASE (COPD)
Department of Veterans Affairs / Department of Defense. VA/DoD Clinical Practice Guideline for the Management of Chronic Obstructive Pulmonary Disease (COPD). 2021. Available from: https://www.healthquality.va.gov/guidelines/cd/copd/						U.S. Preventive Services Task Force (USPSTF). Chronic Obstructive Pulmonary Disease: Screening. 2016. Available from: https://www.uspreventiveservicestaskforce.org/uspstf/recommendation/chronic-obstructive-pulmonary-disease-screening						University of Michigan Health System (UMHS). Chronic Obstructive Pulmonary Disease. 2017. Available from: https://michmed-public.policystat.com/policy/8333780/latest/
	Item	Score					Item	Score					Item	Score
	Domain 1 - Scope and Purpose						Domain 1 - Scope and Purpose						Domain 1 - Scope and Purpose
	Q1 - The overall objective(s) of the guideline is (are) specifically described.	7					Q1 - The overall objective(s) of the guideline is (are) specifically described.	6					Q1 - The overall objective(s) of the guideline is (are) specifically described.	7
	Q2 - The health question(s) covered by the guideline is (are) specifically described.	7					Q2 - The health question(s) covered by the guideline is (are) specifically described.	7					Q2 - The health question(s) covered by the guideline is (are) specifically described.	5
	Q3 - The population (patients, public, etc.) to whom the guideline is meant to apply is specifically described.	7					Q3 - The population (patients, public, etc.) to whom the guideline is meant to apply is specifically described.	7					Q3 - The population (patients, public, etc.) to whom the guideline is meant to apply is specifically described.	6
	Domain 2 - Stakeholder Involvement						Domain 2 - Stakeholder Involvement						Domain 2 - Stakeholder Involvement
	Q4 - The guideline development group includes individuals from all relevant professional groups.	6					Q4 - The guideline development group includes individuals from all relevant professional groups.	5					Q4 - The guideline development group includes individuals from all relevant professional groups.	6
	Q5 - The views and preferences of the target population (patients, public, etc.) have been sought.	7					Q5 - The views and preferences of the target population (patients, public, etc.) have been sought.	5					Q5 - The views and preferences of the target population (patients, public, etc.) have been sought.	1
	Q6 - The target users of the guideline are clearly defined.	7					Q6 - The target users of the guideline are clearly defined.	3					Q6 - The target users of the guideline are clearly defined.	2
	Domain 3 - Rigour of Development						Domain 3 - Rigour of Development						Domain 3 - Rigour of Development
	Q7 - Systematic methods were used to search for evidence.	7					Q7 - Systematic methods were used to search for evidence.	7					Q7 - Systematic methods were used to search for evidence.	7
	Q8 - The criteria for selecting the evidence are clearly described.	7					Q8 - The criteria for selecting the evidence are clearly described.	7					Q8 - The criteria for selecting the evidence are clearly described.	7
	Q9 - The strengths and limitations of the body of evidence are clearly described.	7					Q9 - The strengths and limitations of the body of evidence are clearly described.	6					Q9 - The strengths and limitations of the body of evidence are clearly described.	7
	Q10 - The methods for formulating the recommendations are clearly described.	6					Q10 - The methods for formulating the recommendations are clearly described.	6					Q10 - The methods for formulating the recommendations are clearly described.	3
	Q11 - The health benefits, side effects, and risks have been considered in formulating the recommendations.	6					Q11 - The health benefits, side effects, and risks have been considered in formulating the recommendations.	6					Q11 - The health benefits, side effects, and risks have been considered in formulating the recommendations.	6
	Q12 - There is an explicit link between the recommendations and the supporting evidence.	6					Q12 - There is an explicit link between the recommendations and the supporting evidence.	6					Q12 - There is an explicit link between the recommendations and the supporting evidence.	6
	Q13 - The guideline has been externally reviewed by experts prior to its publication.	6					Q13 - The guideline has been externally reviewed by experts prior to its publication.	5					Q13 - The guideline has been externally reviewed by experts prior to its publication.	5
	Q14 - A procedure for updating the guideline is provided.	6					Q14 - A procedure for updating the guideline is provided.	6					Q14 - A procedure for updating the guideline is provided.	2
	Domain 4 - Clarity of Presentation						Domain 4 - Clarity of Presentation						Domain 4 - Clarity of Presentation
	Q15 - The recommendations are specific and unambiguous.	7					Q15 - The recommendations are specific and unambiguous.	7					Q15 - The recommendations are specific and unambiguous.	6
	Q16 - The different options for management of the condition or health issue are clearly presented.	7					Q16 - The different options for management of the condition or health issue are clearly presented.	5					Q16 - The different options for management of the condition or health issue are clearly presented.	6
	Q17 - Key recommendations are easily identifiable	6					Q17 - Key recommendations are easily identifiable	7					Q17 - Key recommendations are easily identifiable	6
	Domain 5 - Applicability						Domain 5 - Applicability						Domain 5 - Applicability
	Q18 - The guideline describes facilitators and barriers to its application.	6					Q18 - The guideline describes facilitators and barriers to its application.	4					Q18 - The guideline describes facilitators and barriers to its application.	3
	Q19 - The guideline provides advice and/or tools on how the recommendations can be put into practice.	7					Q19 - The guideline provides advice and/or tools on how the recommendations can be put into practice.	5					Q19 - The guideline provides advice and/or tools on how the recommendations can be put into practice.	5
	Q20 - The potential resource implications of applying the recommendations have been considered.	5					Q20 - The potential resource implications of applying the recommendations have been considered.	3					Q20 - The potential resource implications of applying the recommendations have been considered.	4
	Q21 - The guideline presents monitoring and/or auditing criteria.	5					Q21 - The guideline presents monitoring and/or auditing criteria.	2					Q21 - The guideline presents monitoring and/or auditing criteria.	3
	Domain 6 - Editorial Independence						Domain 6 - Editorial Independence						Domain 6 - Editorial Independence
	Q22 - The views of the funding body have not influenced the content of the guideline.	2					Q22 - The views of the funding body have not influenced the content of the guideline.	6					Q22 - The views of the funding body have not influenced the content of the guideline.	2
	Q23 - Competing interests of guideline development group members have been recorded and addressed.	6					Q23 - Competing interests of guideline development group members have been recorded and addressed.	5					Q23 - Competing interests of guideline development group members have been recorded and addressed.	5
	Overall Guideline Assessment						Overall Guideline Assessment						Overall Guideline Assessment
	Overall quality of this guideline	6					Overall quality of this guideline	5					Overall quality of this guideline	5
	COLORECTAL CANCER
US Preventive Services Task Force. Screening for Colorectal Cancer: US Preventive Services Task Force Recommendation Statement. 2021. Available from: https://www.uspreventiveservicestaskforce.org/uspstf/recommendation/colorectal-cancer-screening						Helsingen et al. Colorectal Cancer Screening with Faecal Immunochemical Testing, Sigmoidoscopy or Colonoscopy: A Clinical Practice Guideline. BMJ 2019. Available from: https://www.bmj.com/content/367/bmj.l5515						The Canadian Association of Gastroenterology Banff Consensus. Clinical Practice Guideline on Screening for Colorectal Cancer in Individuals With a Family History of Nonhereditary Colorectal Cancer or Adenoma. 2018. Available from: https://doi.org/10.1053/j.gastro.2018.08.017						Colorectal Cancer Screening for Average-Risk Adults: 2018 Guideline Update from the American Cancer Society. Available from: https://doi.org/10.3322/caac.21457						Canadian Task Force on Preventive Health Care. Recommendations on Screening for Colorectal Cancer in Primary Care. 2016. Available from: https://canadiantaskforce.ca/guidelines/published-guidelines/colorectal-cancer/
	Item	Score					Item	Score					Item	Score					Item	Score					Item	Score
	Domain 1 - Scope and Purpose						Domain 1 - Scope and Purpose						Domain 1 - Scope and Purpose						Domain 1 - Scope and Purpose						Domain 1 - Scope and Purpose
	Q1 - The overall objective(s) of the guideline is (are) specifically described.	6					Q1 - The overall objective(s) of the guideline is (are) specifically described.	7					Q1 - The overall objective(s) of the guideline is (are) specifically described.	7					Q1 - The overall objective(s) of the guideline is (are) specifically described.	7					Q1 - The overall objective(s) of the guideline is (are) specifically described.	6
	Q2 - The health question(s) covered by the guideline is (are) specifically described.	7					Q2 - The health question(s) covered by the guideline is (are) specifically described.	7					Q2 - The health question(s) covered by the guideline is (are) specifically described.	7					Q2 - The health question(s) covered by the guideline is (are) specifically described.	7					Q2 - The health question(s) covered by the guideline is (are) specifically described.	7
	Q3 - The population (patients, public, etc.) to whom the guideline is meant to apply is specifically described.	7					Q3 - The population (patients, public, etc.) to whom the guideline is meant to apply is specifically described.	7					Q3 - The population (patients, public, etc.) to whom the guideline is meant to apply is specifically described.	6					Q3 - The population (patients, public, etc.) to whom the guideline is meant to apply is specifically described.	6					Q3 - The population (patients, public, etc.) to whom the guideline is meant to apply is specifically described.	6
	Domain 2 - Stakeholder Involvement						Domain 2 - Stakeholder Involvement						Domain 2 - Stakeholder Involvement						Domain 2 - Stakeholder Involvement						Domain 2 - Stakeholder Involvement
	Q4 - The guideline development group includes individuals from all relevant professional groups.	6					Q4 - The guideline development group includes individuals from all relevant professional groups.	6					Q4 - The guideline development group includes individuals from all relevant professional groups.	7					Q4 - The guideline development group includes individuals from all relevant professional groups.	7					Q4 - The guideline development group includes individuals from all relevant professional groups.	5
	Q5 - The views and preferences of the target population (patients, public, etc.) have been sought.	3					Q5 - The views and preferences of the target population (patients, public, etc.) have been sought.	6					Q5 - The views and preferences of the target population (patients, public, etc.) have been sought.	6					Q5 - The views and preferences of the target population (patients, public, etc.) have been sought.	5					Q5 - The views and preferences of the target population (patients, public, etc.) have been sought.	4
	Q6 - The target users of the guideline are clearly defined.	4					Q6 - The target users of the guideline are clearly defined.	4					Q6 - The target users of the guideline are clearly defined.	4					Q6 - The target users of the guideline are clearly defined.	6					Q6 - The target users of the guideline are clearly defined.	6
	Domain 3 - Rigour of Development						Domain 3 - Rigour of Development						Domain 3 - Rigour of Development						Domain 3 - Rigour of Development						Domain 3 - Rigour of Development
	Q7 - Systematic methods were used to search for evidence.	7					Q7 - Systematic methods were used to search for evidence.	6					Q7 - Systematic methods were used to search for evidence.	7					Q7 - Systematic methods were used to search for evidence.	7					Q7 - Systematic methods were used to search for evidence.	7
	Q8 - The criteria for selecting the evidence are clearly described.	7					Q8 - The criteria for selecting the evidence are clearly described.	6					Q8 - The criteria for selecting the evidence are clearly described.	7					Q8 - The criteria for selecting the evidence are clearly described.	7					Q8 - The criteria for selecting the evidence are clearly described.	7
	Q9 - The strengths and limitations of the body of evidence are clearly described.	7					Q9 - The strengths and limitations of the body of evidence are clearly described.	6					Q9 - The strengths and limitations of the body of evidence are clearly described.	7					Q9 - The strengths and limitations of the body of evidence are clearly described.	7					Q9 - The strengths and limitations of the body of evidence are clearly described.	7
	Q10 - The methods for formulating the recommendations are clearly described.	6					Q10 - The methods for formulating the recommendations are clearly described.	6					Q10 - The methods for formulating the recommendations are clearly described.	7					Q10 - The methods for formulating the recommendations are clearly described.	6					Q10 - The methods for formulating the recommendations are clearly described.	7
	Q11 - The health benefits, side effects, and risks have been considered in formulating the recommendations.	7					Q11 - The health benefits, side effects, and risks have been considered in formulating the recommendations.	7					Q11 - The health benefits, side effects, and risks have been considered in formulating the recommendations.	6					Q11 - The health benefits, side effects, and risks have been considered in formulating the recommendations.	7					Q11 - The health benefits, side effects, and risks have been considered in formulating the recommendations.	7
	Q12 - There is an explicit link between the recommendations and the supporting evidence.	6					Q12 - There is an explicit link between the recommendations and the supporting evidence.	5					Q12 - There is an explicit link between the recommendations and the supporting evidence.	6					Q12 - There is an explicit link between the recommendations and the supporting evidence.	7					Q12 - There is an explicit link between the recommendations and the supporting evidence.	7
	Q13 - The guideline has been externally reviewed by experts prior to its publication.	5					Q13 - The guideline has been externally reviewed by experts prior to its publication.	5					Q13 - The guideline has been externally reviewed by experts prior to its publication.	4					Q13 - The guideline has been externally reviewed by experts prior to its publication.	6					Q13 - The guideline has been externally reviewed by experts prior to its publication.	5
	Q14 - A procedure for updating the guideline is provided.	6					Q14 - A procedure for updating the guideline is provided.	5					Q14 - A procedure for updating the guideline is provided.	2					Q14 - A procedure for updating the guideline is provided.	6					Q14 - A procedure for updating the guideline is provided.	4
	Domain 4 - Clarity of Presentation						Domain 4 - Clarity of Presentation						Domain 4 - Clarity of Presentation						Domain 4 - Clarity of Presentation						Domain 4 - Clarity of Presentation
	Q15 - The recommendations are specific and unambiguous.	6					Q15 - The recommendations are specific and unambiguous.	6					Q15 - The recommendations are specific and unambiguous.	7					Q15 - The recommendations are specific and unambiguous.	7					Q15 - The recommendations are specific and unambiguous.	7
	Q16 - The different options for management of the condition or health issue are clearly presented.	6					Q16 - The different options for management of the condition or health issue are clearly presented.	6					Q16 - The different options for management of the condition or health issue are clearly presented.	7					Q16 - The different options for management of the condition or health issue are clearly presented.	6					Q16 - The different options for management of the condition or health issue are clearly presented.	6
	Q17 - Key recommendations are easily identifiable	7					Q17 - Key recommendations are easily identifiable	6					Q17 - Key recommendations are easily identifiable	7					Q17 - Key recommendations are easily identifiable	7					Q17 - Key recommendations are easily identifiable	7
	Domain 5 - Applicability						Domain 5 - Applicability						Domain 5 - Applicability						Domain 5 - Applicability						Domain 5 - Applicability
	Q18 - The guideline describes facilitators and barriers to its application.	5					Q18 - The guideline describes facilitators and barriers to its application.	6					Q18 - The guideline describes facilitators and barriers to its application.	3					Q18 - The guideline describes facilitators and barriers to its application.	6					Q18 - The guideline describes facilitators and barriers to its application.	4
	Q19 - The guideline provides advice and/or tools on how the recommendations can be put into practice.	3					Q19 - The guideline provides advice and/or tools on how the recommendations can be put into practice.	6					Q19 - The guideline provides advice and/or tools on how the recommendations can be put into practice.	2					Q19 - The guideline provides advice and/or tools on how the recommendations can be put into practice.	6					Q19 - The guideline provides advice and/or tools on how the recommendations can be put into practice.	6
	Q20 - The potential resource implications of applying the recommendations have been considered.	4					Q20 - The potential resource implications of applying the recommendations have been considered.	3					Q20 - The potential resource implications of applying the recommendations have been considered.	6					Q20 - The potential resource implications of applying the recommendations have been considered.	5					Q20 - The potential resource implications of applying the recommendations have been considered.	6
	Q21 - The guideline presents monitoring and/or auditing criteria.	3					Q21 - The guideline presents monitoring and/or auditing criteria.	3					Q21 - The guideline presents monitoring and/or auditing criteria.	3					Q21 - The guideline presents monitoring and/or auditing criteria.	3					Q21 - The guideline presents monitoring and/or auditing criteria.	6
	Domain 6 - Editorial Independence						Domain 6 - Editorial Independence						Domain 6 - Editorial Independence						Domain 6 - Editorial Independence						Domain 6 - Editorial Independence
	Q22 - The views of the funding body have not influenced the content of the guideline.	6					Q22 - The views of the funding body have not influenced the content of the guideline.	6					Q22 - The views of the funding body have not influenced the content of the guideline.	7					Q22 - The views of the funding body have not influenced the content of the guideline.	6					Q22 - The views of the funding body have not influenced the content of the guideline.	4
	Q23 - Competing interests of guideline development group members have been recorded and addressed.	5					Q23 - Competing interests of guideline development group members have been recorded and addressed.	6					Q23 - Competing interests of guideline development group members have been recorded and addressed.	7					Q23 - Competing interests of guideline development group members have been recorded and addressed.	6					Q23 - Competing interests of guideline development group members have been recorded and addressed.	6
	Overall Guideline Assessment						Overall Guideline Assessment						Overall Guideline Assessment						Overall Guideline Assessment						Overall Guideline Assessment
	Overall quality of this guideline	6					Overall quality of this guideline	6					Overall quality of this guideline	6					Overall quality of this guideline	6					Overall quality of this guideline	6
	DIABETES
Diabetes Canada Clinical Practice Guidelines Expert Committee. Diabetes Canada 2018 Clinical Practice Guidelines for the Prevention and Management of Diabetes in Canada. Can J Diabetes. 2018;42(Suppl 1):S1-S325. Available from: http://guidelines.diabetes.ca/cpg						U.S. Preventive Services Task Force. Final Recommendation Statement. Prediabetes and Type 2 Diabetes: Screening. 2021. Available from: https://www.uspreventiveservicestaskforce.org/ uspstf/recommendation/screening-for-prediabetes-and-type-2-diabetes						American Association of Clinical Endocrinology. The Use of Advanced Technology in the Management of Persons With Diabetes Mellitus: Clinical Practice Guideline. 2021. Available from: https://pro.aace.com/ disease-state-resources/diabetes-diabetes-technology/clinical-practice-guidelines-treatment-0						Department of Veterans Affairs / Department of Defense. VA/DoD Clinical Practice Guideline for the Management of Type 2 Diabetes Mellitus in Primary Care. 2017. Available from: https://www.healthquality.va.gov/guidelines/CD/diabetes/
	Item	Score					Item	Score					Item	Score					Item	Score
	Domain 1 - Scope and Purpose						Domain 1 - Scope and Purpose						Domain 1 - Scope and Purpose						Domain 1 - Scope and Purpose
	Q1 - The overall objective(s) of the guideline is (are) specifically described.	7					Q1 - The overall objective(s) of the guideline is (are) specifically described.	7					Q1 - The overall objective(s) of the guideline is (are) specifically described.	7					Q1 - The overall objective(s) of the guideline is (are) specifically described.	7
	Q2 - The health question(s) covered by the guideline is (are) specifically described.	6					Q2 - The health question(s) covered by the guideline is (are) specifically described.	6					Q2 - The health question(s) covered by the guideline is (are) specifically described.	6					Q2 - The health question(s) covered by the guideline is (are) specifically described.	6
	Q3 - The population (patients, public, etc.) to whom the guideline is meant to apply is specifically described.	6					Q3 - The population (patients, public, etc.) to whom the guideline is meant to apply is specifically described.	7					Q3 - The population (patients, public, etc.) to whom the guideline is meant to apply is specifically described.	6					Q3 - The population (patients, public, etc.) to whom the guideline is meant to apply is specifically described.	6
	Domain 2 - Stakeholder Involvement						Domain 2 - Stakeholder Involvement						Domain 2 - Stakeholder Involvement						Domain 2 - Stakeholder Involvement
	Q4 - The guideline development group includes individuals from all relevant professional groups.	7					Q4 - The guideline development group includes individuals from all relevant professional groups.	5					Q4 - The guideline development group includes individuals from all relevant professional groups.	5					Q4 - The guideline development group includes individuals from all relevant professional groups.	4
	Q5 - The views and preferences of the target population (patients, public, etc.) have been sought.	6					Q5 - The views and preferences of the target population (patients, public, etc.) have been sought.	4					Q5 - The views and preferences of the target population (patients, public, etc.) have been sought.	1					Q5 - The views and preferences of the target population (patients, public, etc.) have been sought.	6
	Q6 - The target users of the guideline are clearly defined.	6					Q6 - The target users of the guideline are clearly defined.	3					Q6 - The target users of the guideline are clearly defined.	6					Q6 - The target users of the guideline are clearly defined.	6
	Domain 3 - Rigour of Development						Domain 3 - Rigour of Development						Domain 3 - Rigour of Development						Domain 3 - Rigour of Development
	Q7 - Systematic methods were used to search for evidence.	5					Q7 - Systematic methods were used to search for evidence.	7					Q7 - Systematic methods were used to search for evidence.	4					Q7 - Systematic methods were used to search for evidence.	7
	Q8 - The criteria for selecting the evidence are clearly described.	4					Q8 - The criteria for selecting the evidence are clearly described.	7					Q8 - The criteria for selecting the evidence are clearly described.	7					Q8 - The criteria for selecting the evidence are clearly described.	7
	Q9 - The strengths and limitations of the body of evidence are clearly described.	5					Q9 - The strengths and limitations of the body of evidence are clearly described.	7					Q9 - The strengths and limitations of the body of evidence are clearly described.	6					Q9 - The strengths and limitations of the body of evidence are clearly described.	7
	Q10 - The methods for formulating the recommendations are clearly described.	6					Q10 - The methods for formulating the recommendations are clearly described.	6					Q10 - The methods for formulating the recommendations are clearly described.	6					Q10 - The methods for formulating the recommendations are clearly described.	6
	Q11 - The health benefits, side effects, and risks have been considered in formulating the recommendations.	6					Q11 - The health benefits, side effects, and risks have been considered in formulating the recommendations.	7					Q11 - The health benefits, side effects, and risks have been considered in formulating the recommendations.	6					Q11 - The health benefits, side effects, and risks have been considered in formulating the recommendations.	6
	Q12 - There is an explicit link between the recommendations and the supporting evidence.	6					Q12 - There is an explicit link between the recommendations and the supporting evidence.	6					Q12 - There is an explicit link between the recommendations and the supporting evidence.	5					Q12 - There is an explicit link between the recommendations and the supporting evidence.	6
	Q13 - The guideline has been externally reviewed by experts prior to its publication.	5					Q13 - The guideline has been externally reviewed by experts prior to its publication.	4					Q13 - The guideline has been externally reviewed by experts prior to its publication.	5					Q13 - The guideline has been externally reviewed by experts prior to its publication.	6
	Q14 - A procedure for updating the guideline is provided.	4					Q14 - A procedure for updating the guideline is provided.	5					Q14 - A procedure for updating the guideline is provided.	6					Q14 - A procedure for updating the guideline is provided.	5
	Domain 4 - Clarity of Presentation						Domain 4 - Clarity of Presentation						Domain 4 - Clarity of Presentation						Domain 4 - Clarity of Presentation
	Q15 - The recommendations are specific and unambiguous.	7					Q15 - The recommendations are specific and unambiguous.	6					Q15 - The recommendations are specific and unambiguous.	6					Q15 - The recommendations are specific and unambiguous.	7
	Q16 - The different options for management of the condition or health issue are clearly presented.	7					Q16 - The different options for management of the condition or health issue are clearly presented.	7					Q16 - The different options for management of the condition or health issue are clearly presented.	5					Q16 - The different options for management of the condition or health issue are clearly presented.	6
	Q17 - Key recommendations are easily identifiable	6					Q17 - Key recommendations are easily identifiable	7					Q17 - Key recommendations are easily identifiable	7					Q17 - Key recommendations are easily identifiable	7
	Domain 5 - Applicability						Domain 5 - Applicability						Domain 5 - Applicability						Domain 5 - Applicability
	Q18 - The guideline describes facilitators and barriers to its application.	4					Q18 - The guideline describes facilitators and barriers to its application.	4					Q18 - The guideline describes facilitators and barriers to its application.	3					Q18 - The guideline describes facilitators and barriers to its application.	4
	Q19 - The guideline provides advice and/or tools on how the recommendations can be put into practice.	6					Q19 - The guideline provides advice and/or tools on how the recommendations can be put into practice.	6					Q19 - The guideline provides advice and/or tools on how the recommendations can be put into practice.	6					Q19 - The guideline provides advice and/or tools on how the recommendations can be put into practice.	7
	Q20 - The potential resource implications of applying the recommendations have been considered.	1					Q20 - The potential resource implications of applying the recommendations have been considered.	2					Q20 - The potential resource implications of applying the recommendations have been considered.	6					Q20 - The potential resource implications of applying the recommendations have been considered.	5
	Q21 - The guideline presents monitoring and/or auditing criteria.	2					Q21 - The guideline presents monitoring and/or auditing criteria.	2					Q21 - The guideline presents monitoring and/or auditing criteria.	2					Q21 - The guideline presents monitoring and/or auditing criteria.	4
	Domain 6 - Editorial Independence						Domain 6 - Editorial Independence						Domain 6 - Editorial Independence						Domain 6 - Editorial Independence
	Q22 - The views of the funding body have not influenced the content of the guideline.	6					Q22 - The views of the funding body have not influenced the content of the guideline.	5					Q22 - The views of the funding body have not influenced the content of the guideline.	6					Q22 - The views of the funding body have not influenced the content of the guideline.	1
	Q23 - Competing interests of guideline development group members have been recorded and addressed.	5					Q23 - Competing interests of guideline development group members have been recorded and addressed.	4					Q23 - Competing interests of guideline development group members have been recorded and addressed.	7					Q23 - Competing interests of guideline development group members have been recorded and addressed.	7
	Overall Guideline Assessment						Overall Guideline Assessment						Overall Guideline Assessment						Overall Guideline Assessment
	Overall quality of this guideline	6					Overall quality of this guideline	5					Overall quality of this guideline	6					Overall quality of this guideline	6
	DIET/NUTRITION
U.S. Preventive Services Task Force (USPSTF). Healthy Diet and Physical Activity for Cardiovascular Disease Prevention in Adults With Cardiovascular Risk Factors: Behavioral Counseling Interventions. 2020. Available from: https://www.uspreventiveservicestaskforce.org/uspstf/recommendation/healthy-diet-and-physical-activity-counseling-adults-with-high-risk-of-cvd						Diabetes Canada Clinical Practice Guidelines Expert Committee. Diabetes Canada 2018 Clinical Practice Guidelines for the Prevention and Management of Diabetes in Canada. Can J Diabetes. 2018;42(Suppl 1):S1-S325. Available from: http://guidelines.diabetes.ca/cpg						American College of Cardiology/American Heart Association Task Force on Clinical Practice Guidelines. 2019 ACC/AHA Guideline on the Primary Prevention of Cardiovascular Disease. J Am Coll Cardiol 2019 Sep 74(10) pp e177-e232. Available from: https://www.jacc.org/doi/10.1016/j.jacc.2019.03.010						Department of Veterans Affairs / Department of Defense. VA/DoD Clinical Practice Guideline for the Management of Dyslipidemia for Cardiovascular Risk Reduction (Lipids). 2020. Available from: https://www.healthquality.va.gov/guidelines/CD/lipids/						Hypertension Canada. Hypertension Canada’s 2020 Comprehensive Guidelines for the Prevention, Diagnosis, Risk Assessment, and Treatment of Hypertension in Adults and Children. 2020. Available from: https://www.onlinecjc.ca/article/S0828-282X(20)30191-4/fulltext						ACOG Committee on Clinical Practice Guidelines. Osteoporosis Prevention, Screening, and Diagnosis. ACOG Clinical Practice Guideline No. 1. 2021. Available from: https://journals.lww.com/greenjournal/ Fulltext/2021/09000/Osteoporosis_Prevention,_Screening,_and_Diagnosis_.30.aspx						Institute for Clinical Systems Improvement (ICSI). Diagnosis and Treatment of Osteoporosis. 2017. Available from: https://www.icsi.org/guideline/osteoporosis/
	Item	Score					Item	Score					Item	Score					Item	Score					Item	Score					Item	Score					Item	Score
	Domain 1 - Scope and Purpose						Domain 1 - Scope and Purpose						Domain 1 - Scope and Purpose						Domain 1 - Scope and Purpose						Domain 1 - Scope and Purpose						Domain 1 - Scope and Purpose						Domain 1 - Scope and Purpose
	Q1 - The overall objective(s) of the guideline is (are) specifically described.	7					Q1 - The overall objective(s) of the guideline is (are) specifically described.	7					Q1 - The overall objective(s) of the guideline is (are) specifically described.	6					Q1 - The overall objective(s) of the guideline is (are) specifically described.	7					Q1 - The overall objective(s) of the guideline is (are) specifically described.	6					Q1 - The overall objective(s) of the guideline is (are) specifically described.	6					Q1 - The overall objective(s) of the guideline is (are) specifically described.	7
	Q2 - The health question(s) covered by the guideline is (are) specifically described.	6					Q2 - The health question(s) covered by the guideline is (are) specifically described.	6					Q2 - The health question(s) covered by the guideline is (are) specifically described.	3					Q2 - The health question(s) covered by the guideline is (are) specifically described.	7					Q2 - The health question(s) covered by the guideline is (are) specifically described.	3					Q2 - The health question(s) covered by the guideline is (are) specifically described.	7					Q2 - The health question(s) covered by the guideline is (are) specifically described.	6
	Q3 - The population (patients, public, etc.) to whom the guideline is meant to apply is specifically described.	7					Q3 - The population (patients, public, etc.) to whom the guideline is meant to apply is specifically described.	6					Q3 - The population (patients, public, etc.) to whom the guideline is meant to apply is specifically described.	5					Q3 - The population (patients, public, etc.) to whom the guideline is meant to apply is specifically described.	7					Q3 - The population (patients, public, etc.) to whom the guideline is meant to apply is specifically described.	4					Q3 - The population (patients, public, etc.) to whom the guideline is meant to apply is specifically described.	7					Q3 - The population (patients, public, etc.) to whom the guideline is meant to apply is specifically described.	7
	Domain 2 - Stakeholder Involvement						Domain 2 - Stakeholder Involvement						Domain 2 - Stakeholder Involvement						Domain 2 - Stakeholder Involvement						Domain 2 - Stakeholder Involvement						Domain 2 - Stakeholder Involvement						Domain 2 - Stakeholder Involvement
	Q4 - The guideline development group includes individuals from all relevant professional groups.	6					Q4 - The guideline development group includes individuals from all relevant professional groups.	7					Q4 - The guideline development group includes individuals from all relevant professional groups.	7					Q4 - The guideline development group includes individuals from all relevant professional groups.	7					Q4 - The guideline development group includes individuals from all relevant professional groups.	7					Q4 - The guideline development group includes individuals from all relevant professional groups.	3					Q4 - The guideline development group includes individuals from all relevant professional groups.	6
	Q5 - The views and preferences of the target population (patients, public, etc.) have been sought.	3					Q5 - The views and preferences of the target population (patients, public, etc.) have been sought.	6					Q5 - The views and preferences of the target population (patients, public, etc.) have been sought.	5					Q5 - The views and preferences of the target population (patients, public, etc.) have been sought.	6					Q5 - The views and preferences of the target population (patients, public, etc.) have been sought.	2					Q5 - The views and preferences of the target population (patients, public, etc.) have been sought.	1					Q5 - The views and preferences of the target population (patients, public, etc.) have been sought.	6
	Q6 - The target users of the guideline are clearly defined.	4					Q6 - The target users of the guideline are clearly defined.	6					Q6 - The target users of the guideline are clearly defined.	5					Q6 - The target users of the guideline are clearly defined.	6					Q6 - The target users of the guideline are clearly defined.	3					Q6 - The target users of the guideline are clearly defined.	3					Q6 - The target users of the guideline are clearly defined.	6
	Domain 3 - Rigour of Development						Domain 3 - Rigour of Development						Domain 3 - Rigour of Development						Domain 3 - Rigour of Development						Domain 3 - Rigour of Development						Domain 3 - Rigour of Development						Domain 3 - Rigour of Development
	Q7 - Systematic methods were used to search for evidence.	7					Q7 - Systematic methods were used to search for evidence.	5					Q7 - Systematic methods were used to search for evidence.	7					Q7 - Systematic methods were used to search for evidence.	7					Q7 - Systematic methods were used to search for evidence.	4					Q7 - Systematic methods were used to search for evidence.	7					Q7 - Systematic methods were used to search for evidence.	5
	Q8 - The criteria for selecting the evidence are clearly described.	7					Q8 - The criteria for selecting the evidence are clearly described.	4					Q8 - The criteria for selecting the evidence are clearly described.	7					Q8 - The criteria for selecting the evidence are clearly described.	7					Q8 - The criteria for selecting the evidence are clearly described.	2					Q8 - The criteria for selecting the evidence are clearly described.	5					Q8 - The criteria for selecting the evidence are clearly described.	4
	Q9 - The strengths and limitations of the body of evidence are clearly described.	6					Q9 - The strengths and limitations of the body of evidence are clearly described.	5					Q9 - The strengths and limitations of the body of evidence are clearly described.	5					Q9 - The strengths and limitations of the body of evidence are clearly described.	6					Q9 - The strengths and limitations of the body of evidence are clearly described.	5					Q9 - The strengths and limitations of the body of evidence are clearly described.	5					Q9 - The strengths and limitations of the body of evidence are clearly described.	5
	Q10 - The methods for formulating the recommendations are clearly described.	6					Q10 - The methods for formulating the recommendations are clearly described.	6					Q10 - The methods for formulating the recommendations are clearly described.	5					Q10 - The methods for formulating the recommendations are clearly described.	6					Q10 - The methods for formulating the recommendations are clearly described.	6					Q10 - The methods for formulating the recommendations are clearly described.	6					Q10 - The methods for formulating the recommendations are clearly described.	4
	Q11 - The health benefits, side effects, and risks have been considered in formulating the recommendations.	6					Q11 - The health benefits, side effects, and risks have been considered in formulating the recommendations.	6					Q11 - The health benefits, side effects, and risks have been considered in formulating the recommendations.	7					Q11 - The health benefits, side effects, and risks have been considered in formulating the recommendations.	6					Q11 - The health benefits, side effects, and risks have been considered in formulating the recommendations.	5					Q11 - The health benefits, side effects, and risks have been considered in formulating the recommendations.	5					Q11 - The health benefits, side effects, and risks have been considered in formulating the recommendations.	7
	Q12 - There is an explicit link between the recommendations and the supporting evidence.	6					Q12 - There is an explicit link between the recommendations and the supporting evidence.	6					Q12 - There is an explicit link between the recommendations and the supporting evidence.	7					Q12 - There is an explicit link between the recommendations and the supporting evidence.	7					Q12 - There is an explicit link between the recommendations and the supporting evidence.	7					Q12 - There is an explicit link between the recommendations and the supporting evidence.	6					Q12 - There is an explicit link between the recommendations and the supporting evidence.	5
	Q13 - The guideline has been externally reviewed by experts prior to its publication.	4					Q13 - The guideline has been externally reviewed by experts prior to its publication.	5					Q13 - The guideline has been externally reviewed by experts prior to its publication.	5					Q13 - The guideline has been externally reviewed by experts prior to its publication.	5					Q13 - The guideline has been externally reviewed by experts prior to its publication.	2					Q13 - The guideline has been externally reviewed by experts prior to its publication.	3					Q13 - The guideline has been externally reviewed by experts prior to its publication.	6
	Q14 - A procedure for updating the guideline is provided.	5					Q14 - A procedure for updating the guideline is provided.	4					Q14 - A procedure for updating the guideline is provided.	4					Q14 - A procedure for updating the guideline is provided.	4					Q14 - A procedure for updating the guideline is provided.	6					Q14 - A procedure for updating the guideline is provided.	6					Q14 - A procedure for updating the guideline is provided.	6
	Domain 4 - Clarity of Presentation						Domain 4 - Clarity of Presentation						Domain 4 - Clarity of Presentation						Domain 4 - Clarity of Presentation						Domain 4 - Clarity of Presentation						Domain 4 - Clarity of Presentation						Domain 4 - Clarity of Presentation
	Q15 - The recommendations are specific and unambiguous.	6					Q15 - The recommendations are specific and unambiguous.	7					Q15 - The recommendations are specific and unambiguous.	7					Q15 - The recommendations are specific and unambiguous.	7					Q15 - The recommendations are specific and unambiguous.	7					Q15 - The recommendations are specific and unambiguous.	6					Q15 - The recommendations are specific and unambiguous.	6
	Q16 - The different options for management of the condition or health issue are clearly presented.	7					Q16 - The different options for management of the condition or health issue are clearly presented.	7					Q16 - The different options for management of the condition or health issue are clearly presented.	7					Q16 - The different options for management of the condition or health issue are clearly presented.	7					Q16 - The different options for management of the condition or health issue are clearly presented.	7					Q16 - The different options for management of the condition or health issue are clearly presented.	5					Q16 - The different options for management of the condition or health issue are clearly presented.	6
	Q17 - Key recommendations are easily identifiable	7					Q17 - Key recommendations are easily identifiable	6					Q17 - Key recommendations are easily identifiable	7					Q17 - Key recommendations are easily identifiable	6					Q17 - Key recommendations are easily identifiable	7					Q17 - Key recommendations are easily identifiable	7					Q17 - Key recommendations are easily identifiable	5
	Domain 5 - Applicability						Domain 5 - Applicability						Domain 5 - Applicability						Domain 5 - Applicability						Domain 5 - Applicability						Domain 5 - Applicability						Domain 5 - Applicability
	Q18 - The guideline describes facilitators and barriers to its application.	4					Q18 - The guideline describes facilitators and barriers to its application.	4					Q18 - The guideline describes facilitators and barriers to its application.	4					Q18 - The guideline describes facilitators and barriers to its application.	5					Q18 - The guideline describes facilitators and barriers to its application.	4					Q18 - The guideline describes facilitators and barriers to its application.	3					Q18 - The guideline describes facilitators and barriers to its application.	4
	Q19 - The guideline provides advice and/or tools on how the recommendations can be put into practice.	4					Q19 - The guideline provides advice and/or tools on how the recommendations can be put into practice.	6					Q19 - The guideline provides advice and/or tools on how the recommendations can be put into practice.	3					Q19 - The guideline provides advice and/or tools on how the recommendations can be put into practice.	7					Q19 - The guideline provides advice and/or tools on how the recommendations can be put into practice.	6					Q19 - The guideline provides advice and/or tools on how the recommendations can be put into practice.	2					Q19 - The guideline provides advice and/or tools on how the recommendations can be put into practice.	7
	Q20 - The potential resource implications of applying the recommendations have been considered.	3					Q20 - The potential resource implications of applying the recommendations have been considered.	1					Q20 - The potential resource implications of applying the recommendations have been considered.	4					Q20 - The potential resource implications of applying the recommendations have been considered.	5					Q20 - The potential resource implications of applying the recommendations have been considered.	2					Q20 - The potential resource implications of applying the recommendations have been considered.	2					Q20 - The potential resource implications of applying the recommendations have been considered.	5
	Q21 - The guideline presents monitoring and/or auditing criteria.	2					Q21 - The guideline presents monitoring and/or auditing criteria.	2					Q21 - The guideline presents monitoring and/or auditing criteria.	2					Q21 - The guideline presents monitoring and/or auditing criteria.	3					Q21 - The guideline presents monitoring and/or auditing criteria.	2					Q21 - The guideline presents monitoring and/or auditing criteria.	3					Q21 - The guideline presents monitoring and/or auditing criteria.	7
	Domain 6 - Editorial Independence						Domain 6 - Editorial Independence						Domain 6 - Editorial Independence						Domain 6 - Editorial Independence						Domain 6 - Editorial Independence						Domain 6 - Editorial Independence						Domain 6 - Editorial Independence
	Q22 - The views of the funding body have not influenced the content of the guideline.	7					Q22 - The views of the funding body have not influenced the content of the guideline.	6					Q22 - The views of the funding body have not influenced the content of the guideline.	7					Q22 - The views of the funding body have not influenced the content of the guideline.	1					Q22 - The views of the funding body have not influenced the content of the guideline.	6					Q22 - The views of the funding body have not influenced the content of the guideline.	7					Q22 - The views of the funding body have not influenced the content of the guideline.	7
	Q23 - Competing interests of guideline development group members have been recorded and addressed.	6					Q23 - Competing interests of guideline development group members have been recorded and addressed.	5					Q23 - Competing interests of guideline development group members have been recorded and addressed.	7					Q23 - Competing interests of guideline development group members have been recorded and addressed.	4					Q23 - Competing interests of guideline development group members have been recorded and addressed.	5					Q23 - Competing interests of guideline development group members have been recorded and addressed.	6					Q23 - Competing interests of guideline development group members have been recorded and addressed.	6
	Overall Guideline Assessment						Overall Guideline Assessment						Overall Guideline Assessment						Overall Guideline Assessment						Overall Guideline Assessment						Overall Guideline Assessment						Overall Guideline Assessment
	Overall quality of this guideline	6					Overall quality of this guideline	6					Overall quality of this guideline	6					Overall quality of this guideline	5					Overall quality of this guideline	4					Overall quality of this guideline	5					Overall quality of this guideline	6
	DRUG/SUBSTANCE USE
Department of Veterans Affairs / Department of Defense. VA/DoD Clinical Practice Guideline for the Management of Substance Use Disorders Version 4.0. 2021. Available from: https://www.healthquality.va.gov/guidelines/mh/sud/						U.S. Preventive Services Task Force (USPSTF). Unhealthy Drug Use: Screening. 2020. Available from: https://www.uspreventiveservicestaskforce.org/uspstf/recommendation/drug-use-illicit-screening						Patients Experience Evidence Research (PEER). PEER Simplified Guideline: Managing Opioid Use Disorder (OUD) in Primary Care. 2019. Available from: https://actt.albertadoctors.org/CPGs/Pages/Opioid-Use-Disorder.aspx
	Item	Score					Item	Score					Item	Score
	Domain 1 - Scope and Purpose						Domain 1 - Scope and Purpose						Domain 1 - Scope and Purpose
	Q1 - The overall objective(s) of the guideline is (are) specifically described.	7					Q1 - The overall objective(s) of the guideline is (are) specifically described.	7					Q1 - The overall objective(s) of the guideline is (are) specifically described.	7
	Q2 - The health question(s) covered by the guideline is (are) specifically described.	7					Q2 - The health question(s) covered by the guideline is (are) specifically described.	6					Q2 - The health question(s) covered by the guideline is (are) specifically described.	7
	Q3 - The population (patients, public, etc.) to whom the guideline is meant to apply is specifically described.	7					Q3 - The population (patients, public, etc.) to whom the guideline is meant to apply is specifically described.	7					Q3 - The population (patients, public, etc.) to whom the guideline is meant to apply is specifically described.	6
	Domain 2 - Stakeholder Involvement						Domain 2 - Stakeholder Involvement						Domain 2 - Stakeholder Involvement
	Q4 - The guideline development group includes individuals from all relevant professional groups.	7					Q4 - The guideline development group includes individuals from all relevant professional groups.	6					Q4 - The guideline development group includes individuals from all relevant professional groups.	7
	Q5 - The views and preferences of the target population (patients, public, etc.) have been sought.	6					Q5 - The views and preferences of the target population (patients, public, etc.) have been sought.	4					Q5 - The views and preferences of the target population (patients, public, etc.) have been sought.	6
	Q6 - The target users of the guideline are clearly defined.	7					Q6 - The target users of the guideline are clearly defined.	4					Q6 - The target users of the guideline are clearly defined.	6
	Domain 3 - Rigour of Development						Domain 3 - Rigour of Development						Domain 3 - Rigour of Development
	Q7 - Systematic methods were used to search for evidence.	7					Q7 - Systematic methods were used to search for evidence.	7					Q7 - Systematic methods were used to search for evidence.	7
	Q8 - The criteria for selecting the evidence are clearly described.	7					Q8 - The criteria for selecting the evidence are clearly described.	6					Q8 - The criteria for selecting the evidence are clearly described.	7
	Q9 - The strengths and limitations of the body of evidence are clearly described.	6					Q9 - The strengths and limitations of the body of evidence are clearly described.	6					Q9 - The strengths and limitations of the body of evidence are clearly described.	7
	Q10 - The methods for formulating the recommendations are clearly described.	6					Q10 - The methods for formulating the recommendations are clearly described.	5					Q10 - The methods for formulating the recommendations are clearly described.	5
	Q11 - The health benefits, side effects, and risks have been considered in formulating the recommendations.	6					Q11 - The health benefits, side effects, and risks have been considered in formulating the recommendations.	6					Q11 - The health benefits, side effects, and risks have been considered in formulating the recommendations.	7
	Q12 - There is an explicit link between the recommendations and the supporting evidence.	6					Q12 - There is an explicit link between the recommendations and the supporting evidence.	7					Q12 - There is an explicit link between the recommendations and the supporting evidence.	5
	Q13 - The guideline has been externally reviewed by experts prior to its publication.	6					Q13 - The guideline has been externally reviewed by experts prior to its publication.	4					Q13 - The guideline has been externally reviewed by experts prior to its publication.	5
	Q14 - A procedure for updating the guideline is provided.	6					Q14 - A procedure for updating the guideline is provided.	5					Q14 - A procedure for updating the guideline is provided.	2
	Domain 4 - Clarity of Presentation						Domain 4 - Clarity of Presentation						Domain 4 - Clarity of Presentation
	Q15 - The recommendations are specific and unambiguous.	7					Q15 - The recommendations are specific and unambiguous.	6					Q15 - The recommendations are specific and unambiguous.	7
	Q16 - The different options for management of the condition or health issue are clearly presented.	7					Q16 - The different options for management of the condition or health issue are clearly presented.	5					Q16 - The different options for management of the condition or health issue are clearly presented.	6
	Q17 - Key recommendations are easily identifiable	6					Q17 - Key recommendations are easily identifiable	7					Q17 - Key recommendations are easily identifiable	7
	Domain 5 - Applicability						Domain 5 - Applicability						Domain 5 - Applicability
	Q18 - The guideline describes facilitators and barriers to its application.	5					Q18 - The guideline describes facilitators and barriers to its application.	3					Q18 - The guideline describes facilitators and barriers to its application.	6
	Q19 - The guideline provides advice and/or tools on how the recommendations can be put into practice.	6					Q19 - The guideline provides advice and/or tools on how the recommendations can be put into practice.	4					Q19 - The guideline provides advice and/or tools on how the recommendations can be put into practice.	7
	Q20 - The potential resource implications of applying the recommendations have been considered.	4					Q20 - The potential resource implications of applying the recommendations have been considered.	3					Q20 - The potential resource implications of applying the recommendations have been considered.	4
	Q21 - The guideline presents monitoring and/or auditing criteria.	4					Q21 - The guideline presents monitoring and/or auditing criteria.	2					Q21 - The guideline presents monitoring and/or auditing criteria.	2
	Domain 6 - Editorial Independence						Domain 6 - Editorial Independence						Domain 6 - Editorial Independence
	Q22 - The views of the funding body have not influenced the content of the guideline.	4					Q22 - The views of the funding body have not influenced the content of the guideline.	5					Q22 - The views of the funding body have not influenced the content of the guideline.	5
	Q23 - Competing interests of guideline development group members have been recorded and addressed.	6					Q23 - Competing interests of guideline development group members have been recorded and addressed.	6					Q23 - Competing interests of guideline development group members have been recorded and addressed.	6
	Overall Guideline Assessment						Overall Guideline Assessment						Overall Guideline Assessment
	Overall quality of this guideline	6					Overall quality of this guideline	6					Overall quality of this guideline	6
	HEPATITIS C
Canadian Task Force on Preventive Health Care. Recommendations on Hepatitis C Screening for Adults. 2017. Available from: https://canadiantaskforce.ca/guidelines/published-guidelines/hepatitis-c/						U.S. Preventive Services Task Force (USPSTF). Hepatitis C Virus Infection in Adolescents and Adults: Screening. 2020. Available from: https://www.uspreventiveservicestaskforce.org/uspstf/ recommendation/hepatitis-c-screening						Canadian Association for the Study of the Liver (CASL). The Management of Chronic Hepatitis C: 2018 Guideline Update from the Canadian Association for the Study of the Liver. CMAJ. 2018;190(22):E677-E687. Available from: https://www.cmaj.ca/content/190/22/E677						AASLD/IDSA HCV Guidance Panel. American Association for the Study of Liver Diseases and the Infectious Diseases Society of America Recommendations for Testing, Managing, and Treating Hepatitis C. 2021. Available from: https://www.hcvguidelines.org
	Item	Score					Item	Score					Item	Score					Item	Score
	Domain 1 - Scope and Purpose						Domain 1 - Scope and Purpose						Domain 1 - Scope and Purpose						Domain 1 - Scope and Purpose
	Q1 - The overall objective(s) of the guideline is (are) specifically described.	7					Q1 - The overall objective(s) of the guideline is (are) specifically described.	6					Q1 - The overall objective(s) of the guideline is (are) specifically described.	7					Q1 - The overall objective(s) of the guideline is (are) specifically described.	7
	Q2 - The health question(s) covered by the guideline is (are) specifically described.	6					Q2 - The health question(s) covered by the guideline is (are) specifically described.	6					Q2 - The health question(s) covered by the guideline is (are) specifically described.	2					Q2 - The health question(s) covered by the guideline is (are) specifically described.	3
	Q3 - The population (patients, public, etc.) to whom the guideline is meant to apply is specifically described.	6					Q3 - The population (patients, public, etc.) to whom the guideline is meant to apply is specifically described.	7					Q3 - The population (patients, public, etc.) to whom the guideline is meant to apply is specifically described.	7					Q3 - The population (patients, public, etc.) to whom the guideline is meant to apply is specifically described.	7
	Domain 2 - Stakeholder Involvement						Domain 2 - Stakeholder Involvement						Domain 2 - Stakeholder Involvement						Domain 2 - Stakeholder Involvement
	Q4 - The guideline development group includes individuals from all relevant professional groups.	5					Q4 - The guideline development group includes individuals from all relevant professional groups.	6					Q4 - The guideline development group includes individuals from all relevant professional groups.	4					Q4 - The guideline development group includes individuals from all relevant professional groups.	6
	Q5 - The views and preferences of the target population (patients, public, etc.) have been sought.	6					Q5 - The views and preferences of the target population (patients, public, etc.) have been sought.	3					Q5 - The views and preferences of the target population (patients, public, etc.) have been sought.	5					Q5 - The views and preferences of the target population (patients, public, etc.) have been sought.	5
	Q6 - The target users of the guideline are clearly defined.	5					Q6 - The target users of the guideline are clearly defined.	3					Q6 - The target users of the guideline are clearly defined.	6					Q6 - The target users of the guideline are clearly defined.	6
	Domain 3 - Rigour of Development						Domain 3 - Rigour of Development						Domain 3 - Rigour of Development						Domain 3 - Rigour of Development
	Q7 - Systematic methods were used to search for evidence.	7					Q7 - Systematic methods were used to search for evidence.	7					Q7 - Systematic methods were used to search for evidence.	5					Q7 - Systematic methods were used to search for evidence.	3
	Q8 - The criteria for selecting the evidence are clearly described.	7					Q8 - The criteria for selecting the evidence are clearly described.	7					Q8 - The criteria for selecting the evidence are clearly described.	5					Q8 - The criteria for selecting the evidence are clearly described.	2
	Q9 - The strengths and limitations of the body of evidence are clearly described.	7					Q9 - The strengths and limitations of the body of evidence are clearly described.	7					Q9 - The strengths and limitations of the body of evidence are clearly described.	5					Q9 - The strengths and limitations of the body of evidence are clearly described.	5
	Q10 - The methods for formulating the recommendations are clearly described.	6					Q10 - The methods for formulating the recommendations are clearly described.	6					Q10 - The methods for formulating the recommendations are clearly described.	6					Q10 - The methods for formulating the recommendations are clearly described.	4
	Q11 - The health benefits, side effects, and risks have been considered in formulating the recommendations.	7					Q11 - The health benefits, side effects, and risks have been considered in formulating the recommendations.	6					Q11 - The health benefits, side effects, and risks have been considered in formulating the recommendations.	5					Q11 - The health benefits, side effects, and risks have been considered in formulating the recommendations.	5
	Q12 - There is an explicit link between the recommendations and the supporting evidence.	7					Q12 - There is an explicit link between the recommendations and the supporting evidence.	7					Q12 - There is an explicit link between the recommendations and the supporting evidence.	7					Q12 - There is an explicit link between the recommendations and the supporting evidence.	7
	Q13 - The guideline has been externally reviewed by experts prior to its publication.	7					Q13 - The guideline has been externally reviewed by experts prior to its publication.	4					Q13 - The guideline has been externally reviewed by experts prior to its publication.	5					Q13 - The guideline has been externally reviewed by experts prior to its publication.	2
	Q14 - A procedure for updating the guideline is provided.	4					Q14 - A procedure for updating the guideline is provided.	5					Q14 - A procedure for updating the guideline is provided.	4					Q14 - A procedure for updating the guideline is provided.	5
	Domain 4 - Clarity of Presentation						Domain 4 - Clarity of Presentation						Domain 4 - Clarity of Presentation						Domain 4 - Clarity of Presentation
	Q15 - The recommendations are specific and unambiguous.	7					Q15 - The recommendations are specific and unambiguous.	7					Q15 - The recommendations are specific and unambiguous.	7					Q15 - The recommendations are specific and unambiguous.	7
	Q16 - The different options for management of the condition or health issue are clearly presented.	4					Q16 - The different options for management of the condition or health issue are clearly presented.	4					Q16 - The different options for management of the condition or health issue are clearly presented.	7					Q16 - The different options for management of the condition or health issue are clearly presented.	7
	Q17 - Key recommendations are easily identifiable	7					Q17 - Key recommendations are easily identifiable	7					Q17 - Key recommendations are easily identifiable	7					Q17 - Key recommendations are easily identifiable	7
	Domain 5 - Applicability						Domain 5 - Applicability						Domain 5 - Applicability						Domain 5 - Applicability
	Q18 - The guideline describes facilitators and barriers to its application.	5					Q18 - The guideline describes facilitators and barriers to its application.	3					Q18 - The guideline describes facilitators and barriers to its application.	3					Q18 - The guideline describes facilitators and barriers to its application.	6
	Q19 - The guideline provides advice and/or tools on how the recommendations can be put into practice.	6					Q19 - The guideline provides advice and/or tools on how the recommendations can be put into practice.	4					Q19 - The guideline provides advice and/or tools on how the recommendations can be put into practice.	4					Q19 - The guideline provides advice and/or tools on how the recommendations can be put into practice.	5
	Q20 - The potential resource implications of applying the recommendations have been considered.	6					Q20 - The potential resource implications of applying the recommendations have been considered.	2					Q20 - The potential resource implications of applying the recommendations have been considered.	3					Q20 - The potential resource implications of applying the recommendations have been considered.	7
	Q21 - The guideline presents monitoring and/or auditing criteria.	7					Q21 - The guideline presents monitoring and/or auditing criteria.	2					Q21 - The guideline presents monitoring and/or auditing criteria.	1					Q21 - The guideline presents monitoring and/or auditing criteria.	2
	Domain 6 - Editorial Independence						Domain 6 - Editorial Independence						Domain 6 - Editorial Independence						Domain 6 - Editorial Independence
	Q22 - The views of the funding body have not influenced the content of the guideline.	7					Q22 - The views of the funding body have not influenced the content of the guideline.	5					Q22 - The views of the funding body have not influenced the content of the guideline.	6					Q22 - The views of the funding body have not influenced the content of the guideline.	4
	Q23 - Competing interests of guideline development group members have been recorded and addressed.	4					Q23 - Competing interests of guideline development group members have been recorded and addressed.	6					Q23 - Competing interests of guideline development group members have been recorded and addressed.	6					Q23 - Competing interests of guideline development group members have been recorded and addressed.	7
	Overall Guideline Assessment						Overall Guideline Assessment						Overall Guideline Assessment						Overall Guideline Assessment
	Overall quality of this guideline	6					Overall quality of this guideline	5					Overall quality of this guideline	5					Overall quality of this guideline	4
	LUNG CANCER
U.S. Preventive Services Task Force. Final Recommendation Statement. Lung Cancer: Screening. 2021. Available from: https://www.uspreventiveservicestaskforce.org/uspstf/recommendation/lung-cancer-screening						American College of Chest Physicians. Screening for Lung Cancer: CHEST Guideline and Expert Panel Report. 2021.
	Item	Score					Item	Score
	Domain 1 - Scope and Purpose						Domain 1 - Scope and Purpose
	Q1 - The overall objective(s) of the guideline is (are) specifically described.	6					Q1 - The overall objective(s) of the guideline is (are) specifically described.	7
	Q2 - The health question(s) covered by the guideline is (are) specifically described.	7					Q2 - The health question(s) covered by the guideline is (are) specifically described.	7
	Q3 - The population (patients, public, etc.) to whom the guideline is meant to apply is specifically described.	7					Q3 - The population (patients, public, etc.) to whom the guideline is meant to apply is specifically described.	6
	Domain 2 - Stakeholder Involvement						Domain 2 - Stakeholder Involvement
	Q4 - The guideline development group includes individuals from all relevant professional groups.	6					Q4 - The guideline development group includes individuals from all relevant professional groups.	7
	Q5 - The views and preferences of the target population (patients, public, etc.) have been sought.	5					Q5 - The views and preferences of the target population (patients, public, etc.) have been sought.	2
	Q6 - The target users of the guideline are clearly defined.	4					Q6 - The target users of the guideline are clearly defined.	7
	Domain 3 - Rigour of Development						Domain 3 - Rigour of Development
	Q7 - Systematic methods were used to search for evidence.	7					Q7 - Systematic methods were used to search for evidence.	7
	Q8 - The criteria for selecting the evidence are clearly described.	7					Q8 - The criteria for selecting the evidence are clearly described.	7
	Q9 - The strengths and limitations of the body of evidence are clearly described.	7					Q9 - The strengths and limitations of the body of evidence are clearly described.	7
	Q10 - The methods for formulating the recommendations are clearly described.	6					Q10 - The methods for formulating the recommendations are clearly described.	6
	Q11 - The health benefits, side effects, and risks have been considered in formulating the recommendations.	7					Q11 - The health benefits, side effects, and risks have been considered in formulating the recommendations.	7
	Q12 - There is an explicit link between the recommendations and the supporting evidence.	6					Q12 - There is an explicit link between the recommendations and the supporting evidence.	7
	Q13 - The guideline has been externally reviewed by experts prior to its publication.	5					Q13 - The guideline has been externally reviewed by experts prior to its publication.	6
	Q14 - A procedure for updating the guideline is provided.	6					Q14 - A procedure for updating the guideline is provided.	6
	Domain 4 - Clarity of Presentation						Domain 4 - Clarity of Presentation
	Q15 - The recommendations are specific and unambiguous.	7					Q15 - The recommendations are specific and unambiguous.	6
	Q16 - The different options for management of the condition or health issue are clearly presented.	6					Q16 - The different options for management of the condition or health issue are clearly presented.	5
	Q17 - Key recommendations are easily identifiable	7					Q17 - Key recommendations are easily identifiable	7
	Domain 5 - Applicability						Domain 5 - Applicability
	Q18 - The guideline describes facilitators and barriers to its application.	5					Q18 - The guideline describes facilitators and barriers to its application.	6
	Q19 - The guideline provides advice and/or tools on how the recommendations can be put into practice.	6					Q19 - The guideline provides advice and/or tools on how the recommendations can be put into practice.	4
	Q20 - The potential resource implications of applying the recommendations have been considered.	4					Q20 - The potential resource implications of applying the recommendations have been considered.	6
	Q21 - The guideline presents monitoring and/or auditing criteria.	3					Q21 - The guideline presents monitoring and/or auditing criteria.	2
	Domain 6 - Editorial Independence						Domain 6 - Editorial Independence
	Q22 - The views of the funding body have not influenced the content of the guideline.	7					Q22 - The views of the funding body have not influenced the content of the guideline.	6
	Q23 - Competing interests of guideline development group members have been recorded and addressed.	6					Q23 - Competing interests of guideline development group members have been recorded and addressed.	7
	Overall Guideline Assessment						Overall Guideline Assessment
	Overall quality of this guideline	6					Overall quality of this guideline	7
	OBESITY
Obesity Canada. Canadian Adult Obesity Clinical Practice Guidelines. 2020. Available from: https://obesitycanada.ca/guidelines/						Department of Veterans Affairs / Department of Defense. VA/DoD 2020 Management of Adult Overweight and Obesity. 2020. Available from: https://www.healthquality.va.gov/guidelines/cd/obesity/index.asp						U.S. Preventive Services Task Force (USPSTF). Weight Loss to Prevent Obesity-Related Morbidity and Mortality in Adults: Behavioral Interventions. 2018. Available from: https://www.uspreventiveservicestaskforce.org/uspstf/recommendation/obesity-in-adults-interventions
	Item	Score					Item	Score					Item	Score
	Domain 1 - Scope and Purpose						Domain 1 - Scope and Purpose						Domain 1 - Scope and Purpose
	Q1 - The overall objective(s) of the guideline is (are) specifically described.	6					Q1 - The overall objective(s) of the guideline is (are) specifically described.	6					Q1 - The overall objective(s) of the guideline is (are) specifically described.	6
	Q2 - The health question(s) covered by the guideline is (are) specifically described.	5					Q2 - The health question(s) covered by the guideline is (are) specifically described.	7					Q2 - The health question(s) covered by the guideline is (are) specifically described.	6
	Q3 - The population (patients, public, etc.) to whom the guideline is meant to apply is specifically described.	5					Q3 - The population (patients, public, etc.) to whom the guideline is meant to apply is specifically described.	6					Q3 - The population (patients, public, etc.) to whom the guideline is meant to apply is specifically described.	7
	Domain 2 - Stakeholder Involvement						Domain 2 - Stakeholder Involvement						Domain 2 - Stakeholder Involvement
	Q4 - The guideline development group includes individuals from all relevant professional groups.	6					Q4 - The guideline development group includes individuals from all relevant professional groups.	6					Q4 - The guideline development group includes individuals from all relevant professional groups.	5
	Q5 - The views and preferences of the target population (patients, public, etc.) have been sought.	6					Q5 - The views and preferences of the target population (patients, public, etc.) have been sought.	7					Q5 - The views and preferences of the target population (patients, public, etc.) have been sought.	5
	Q6 - The target users of the guideline are clearly defined.	6					Q6 - The target users of the guideline are clearly defined.	6					Q6 - The target users of the guideline are clearly defined.	2
	Domain 3 - Rigour of Development						Domain 3 - Rigour of Development						Domain 3 - Rigour of Development
	Q7 - Systematic methods were used to search for evidence.	5					Q7 - Systematic methods were used to search for evidence.	7					Q7 - Systematic methods were used to search for evidence.	7
	Q8 - The criteria for selecting the evidence are clearly described.	4					Q8 - The criteria for selecting the evidence are clearly described.	7					Q8 - The criteria for selecting the evidence are clearly described.	7
	Q9 - The strengths and limitations of the body of evidence are clearly described.	5					Q9 - The strengths and limitations of the body of evidence are clearly described.	6					Q9 - The strengths and limitations of the body of evidence are clearly described.	7
	Q10 - The methods for formulating the recommendations are clearly described.	6					Q10 - The methods for formulating the recommendations are clearly described.	6					Q10 - The methods for formulating the recommendations are clearly described.	5
	Q11 - The health benefits, side effects, and risks have been considered in formulating the recommendations.	4					Q11 - The health benefits, side effects, and risks have been considered in formulating the recommendations.	6					Q11 - The health benefits, side effects, and risks have been considered in formulating the recommendations.	6
	Q12 - There is an explicit link between the recommendations and the supporting evidence.	6					Q12 - There is an explicit link between the recommendations and the supporting evidence.	6					Q12 - There is an explicit link between the recommendations and the supporting evidence.	6
	Q13 - The guideline has been externally reviewed by experts prior to its publication.	4					Q13 - The guideline has been externally reviewed by experts prior to its publication.	6					Q13 - The guideline has been externally reviewed by experts prior to its publication.	5
	Q14 - A procedure for updating the guideline is provided.	5					Q14 - A procedure for updating the guideline is provided.	5					Q14 - A procedure for updating the guideline is provided.	6
	Domain 4 - Clarity of Presentation						Domain 4 - Clarity of Presentation						Domain 4 - Clarity of Presentation
	Q15 - The recommendations are specific and unambiguous.	6					Q15 - The recommendations are specific and unambiguous.	6					Q15 - The recommendations are specific and unambiguous.	5
	Q16 - The different options for management of the condition or health issue are clearly presented.	7					Q16 - The different options for management of the condition or health issue are clearly presented.	6					Q16 - The different options for management of the condition or health issue are clearly presented.	5
	Q17 - Key recommendations are easily identifiable	7					Q17 - Key recommendations are easily identifiable	6					Q17 - Key recommendations are easily identifiable	7
	Domain 5 - Applicability						Domain 5 - Applicability						Domain 5 - Applicability
	Q18 - The guideline describes facilitators and barriers to its application.	6					Q18 - The guideline describes facilitators and barriers to its application.	6					Q18 - The guideline describes facilitators and barriers to its application.	4
	Q19 - The guideline provides advice and/or tools on how the recommendations can be put into practice.	6					Q19 - The guideline provides advice and/or tools on how the recommendations can be put into practice.	7					Q19 - The guideline provides advice and/or tools on how the recommendations can be put into practice.	5
	Q20 - The potential resource implications of applying the recommendations have been considered.	5					Q20 - The potential resource implications of applying the recommendations have been considered.	6					Q20 - The potential resource implications of applying the recommendations have been considered.	4
	Q21 - The guideline presents monitoring and/or auditing criteria.	5					Q21 - The guideline presents monitoring and/or auditing criteria.	5					Q21 - The guideline presents monitoring and/or auditing criteria.	2
	Domain 6 - Editorial Independence						Domain 6 - Editorial Independence						Domain 6 - Editorial Independence
	Q22 - The views of the funding body have not influenced the content of the guideline.	7					Q22 - The views of the funding body have not influenced the content of the guideline.	2					Q22 - The views of the funding body have not influenced the content of the guideline.	6
	Q23 - Competing interests of guideline development group members have been recorded and addressed.	6					Q23 - Competing interests of guideline development group members have been recorded and addressed.	5					Q23 - Competing interests of guideline development group members have been recorded and addressed.	5
	Overall Guideline Assessment						Overall Guideline Assessment						Overall Guideline Assessment
	Overall quality of this guideline	5					Overall quality of this guideline	6					Overall quality of this guideline	5
	OSTEOPOROSIS/BONE DENSITY
Scottish Intercollegiate Guidelines Network (SIGN). Management of Osteoporosis and the Prevention of Fragility Fractures. 2021. Available from: https://www.sign.ac.uk/our-guidelines/management-of-osteoporosis-and-the-prevention-of-fragility-fractures/						ACOG Committee on Clinical Practice Guidelines. Osteoporosis Prevention, Screening, and Diagnosis. ACOG Clinical Practice Guideline No. 1. 2021. Available from: https://journals.lww.com/greenjournal/ Fulltext/2021/09000/Osteoporosis_Prevention,_Screening,_and_Diagnosis_.30.aspx						U.S. Preventive Services Task Force (USPSTF). Osteoporosis to Prevent Fractures: Screening. 2018. Available from: https://www.uspreventiveservicestaskforce.org/uspstf/recommendation/osteoporosis-screening						Institute for Clinical Systems Improvement (ICSI). Diagnosis and Treatment of Osteoporosis. 2017. Available from: https://www.icsi.org/guideline/osteoporosis/						American College of Physicians (ACP). Treatment of Low Bone Density or Osteoporosis to Prevent Fractures in Men and Women: A Clinical Practice Guideline Update From the American College of Physicians. 2017. Available from: https://www.acpjournals.org/doi/10.7326/M16-1361						Endocrine Society. Pharmacological Management of Osteoporosis in Postmenopausal Women: An Endocrine Society Guideline Update. 2020. Available from: https://academic.oup.com/jcem/article/105/3/587/5739968 & Endocrine Society. Pharmacological Management of Osteoporosis in Postmenopausal Women: An Endocrine Society Clinical Practice Guideline. 2019. Available from: https://academic.oup.com/jcem/arti…
	Item	Score					Item	Score					Item	Score					Item	Score					Item	Score					Item	Score
	Domain 1 - Scope and Purpose						Domain 1 - Scope and Purpose						Domain 1 - Scope and Purpose						Domain 1 - Scope and Purpose						Domain 1 - Scope and Purpose						Domain 1 - Scope and Purpose
	Q1 - The overall objective(s) of the guideline is (are) specifically described.	7					Q1 - The overall objective(s) of the guideline is (are) specifically described.	6					Q1 - The overall objective(s) of the guideline is (are) specifically described.	6					Q1 - The overall objective(s) of the guideline is (are) specifically described.	7					Q1 - The overall objective(s) of the guideline is (are) specifically described.	6					Q1 - The overall objective(s) of the guideline is (are) specifically described.	6
	Q2 - The health question(s) covered by the guideline is (are) specifically described.	7					Q2 - The health question(s) covered by the guideline is (are) specifically described.	7					Q2 - The health question(s) covered by the guideline is (are) specifically described.	7					Q2 - The health question(s) covered by the guideline is (are) specifically described.	6					Q2 - The health question(s) covered by the guideline is (are) specifically described.	6					Q2 - The health question(s) covered by the guideline is (are) specifically described.	6
	Q3 - The population (patients, public, etc.) to whom the guideline is meant to apply is specifically described.	7					Q3 - The population (patients, public, etc.) to whom the guideline is meant to apply is specifically described.	7					Q3 - The population (patients, public, etc.) to whom the guideline is meant to apply is specifically described.	7					Q3 - The population (patients, public, etc.) to whom the guideline is meant to apply is specifically described.	7					Q3 - The population (patients, public, etc.) to whom the guideline is meant to apply is specifically described.	7					Q3 - The population (patients, public, etc.) to whom the guideline is meant to apply is specifically described.	5
	Domain 2 - Stakeholder Involvement						Domain 2 - Stakeholder Involvement						Domain 2 - Stakeholder Involvement						Domain 2 - Stakeholder Involvement						Domain 2 - Stakeholder Involvement						Domain 2 - Stakeholder Involvement
	Q4 - The guideline development group includes individuals from all relevant professional groups.	7					Q4 - The guideline development group includes individuals from all relevant professional groups.	3					Q4 - The guideline development group includes individuals from all relevant professional groups.	5					Q4 - The guideline development group includes individuals from all relevant professional groups.	6					Q4 - The guideline development group includes individuals from all relevant professional groups.	5					Q4 - The guideline development group includes individuals from all relevant professional groups.	6
	Q5 - The views and preferences of the target population (patients, public, etc.) have been sought.	5					Q5 - The views and preferences of the target population (patients, public, etc.) have been sought.	1					Q5 - The views and preferences of the target population (patients, public, etc.) have been sought.	4					Q5 - The views and preferences of the target population (patients, public, etc.) have been sought.	6					Q5 - The views and preferences of the target population (patients, public, etc.) have been sought.	3					Q5 - The views and preferences of the target population (patients, public, etc.) have been sought.	6
	Q6 - The target users of the guideline are clearly defined.	7					Q6 - The target users of the guideline are clearly defined.	3					Q6 - The target users of the guideline are clearly defined.	3					Q6 - The target users of the guideline are clearly defined.	6					Q6 - The target users of the guideline are clearly defined.	6					Q6 - The target users of the guideline are clearly defined.	6
	Domain 3 - Rigour of Development						Domain 3 - Rigour of Development						Domain 3 - Rigour of Development						Domain 3 - Rigour of Development						Domain 3 - Rigour of Development						Domain 3 - Rigour of Development
	Q7 - Systematic methods were used to search for evidence.	7					Q7 - Systematic methods were used to search for evidence.	7					Q7 - Systematic methods were used to search for evidence.	7					Q7 - Systematic methods were used to search for evidence.	5					Q7 - Systematic methods were used to search for evidence.	5					Q7 - Systematic methods were used to search for evidence.	6
	Q8 - The criteria for selecting the evidence are clearly described.	5					Q8 - The criteria for selecting the evidence are clearly described.	5					Q8 - The criteria for selecting the evidence are clearly described.	7					Q8 - The criteria for selecting the evidence are clearly described.	4					Q8 - The criteria for selecting the evidence are clearly described.	5					Q8 - The criteria for selecting the evidence are clearly described.	6
	Q9 - The strengths and limitations of the body of evidence are clearly described.	6					Q9 - The strengths and limitations of the body of evidence are clearly described.	5					Q9 - The strengths and limitations of the body of evidence are clearly described.	6					Q9 - The strengths and limitations of the body of evidence are clearly described.	5					Q9 - The strengths and limitations of the body of evidence are clearly described.	6					Q9 - The strengths and limitations of the body of evidence are clearly described.	5
	Q10 - The methods for formulating the recommendations are clearly described.	6					Q10 - The methods for formulating the recommendations are clearly described.	6					Q10 - The methods for formulating the recommendations are clearly described.	6					Q10 - The methods for formulating the recommendations are clearly described.	4					Q10 - The methods for formulating the recommendations are clearly described.	5					Q10 - The methods for formulating the recommendations are clearly described.	2
	Q11 - The health benefits, side effects, and risks have been considered in formulating the recommendations.	6					Q11 - The health benefits, side effects, and risks have been considered in formulating the recommendations.	5					Q11 - The health benefits, side effects, and risks have been considered in formulating the recommendations.	5					Q11 - The health benefits, side effects, and risks have been considered in formulating the recommendations.	7					Q11 - The health benefits, side effects, and risks have been considered in formulating the recommendations.	7					Q11 - The health benefits, side effects, and risks have been considered in formulating the recommendations.	7
	Q12 - There is an explicit link between the recommendations and the supporting evidence.	4					Q12 - There is an explicit link between the recommendations and the supporting evidence.	6					Q12 - There is an explicit link between the recommendations and the supporting evidence.	6					Q12 - There is an explicit link between the recommendations and the supporting evidence.	5					Q12 - There is an explicit link between the recommendations and the supporting evidence.	6					Q12 - There is an explicit link between the recommendations and the supporting evidence.	7
	Q13 - The guideline has been externally reviewed by experts prior to its publication.	7					Q13 - The guideline has been externally reviewed by experts prior to its publication.	3					Q13 - The guideline has been externally reviewed by experts prior to its publication.	5					Q13 - The guideline has been externally reviewed by experts prior to its publication.	6					Q13 - The guideline has been externally reviewed by experts prior to its publication.	4					Q13 - The guideline has been externally reviewed by experts prior to its publication.	5
	Q14 - A procedure for updating the guideline is provided.	6					Q14 - A procedure for updating the guideline is provided.	6					Q14 - A procedure for updating the guideline is provided.	6					Q14 - A procedure for updating the guideline is provided.	6					Q14 - A procedure for updating the guideline is provided.	4					Q14 - A procedure for updating the guideline is provided.	1
	Domain 4 - Clarity of Presentation						Domain 4 - Clarity of Presentation						Domain 4 - Clarity of Presentation						Domain 4 - Clarity of Presentation						Domain 4 - Clarity of Presentation						Domain 4 - Clarity of Presentation
	Q15 - The recommendations are specific and unambiguous.	6					Q15 - The recommendations are specific and unambiguous.	6					Q15 - The recommendations are specific and unambiguous.	6					Q15 - The recommendations are specific and unambiguous.	6					Q15 - The recommendations are specific and unambiguous.	5					Q15 - The recommendations are specific and unambiguous.	7
	Q16 - The different options for management of the condition or health issue are clearly presented.	6					Q16 - The different options for management of the condition or health issue are clearly presented.	5					Q16 - The different options for management of the condition or health issue are clearly presented.	5					Q16 - The different options for management of the condition or health issue are clearly presented.	6					Q16 - The different options for management of the condition or health issue are clearly presented.	4					Q16 - The different options for management of the condition or health issue are clearly presented.	6
	Q17 - Key recommendations are easily identifiable	7					Q17 - Key recommendations are easily identifiable	7					Q17 - Key recommendations are easily identifiable	7					Q17 - Key recommendations are easily identifiable	5					Q17 - Key recommendations are easily identifiable	7					Q17 - Key recommendations are easily identifiable	7
	Domain 5 - Applicability						Domain 5 - Applicability						Domain 5 - Applicability						Domain 5 - Applicability						Domain 5 - Applicability						Domain 5 - Applicability
	Q18 - The guideline describes facilitators and barriers to its application.	6					Q18 - The guideline describes facilitators and barriers to its application.	3					Q18 - The guideline describes facilitators and barriers to its application.	4					Q18 - The guideline describes facilitators and barriers to its application.	4					Q18 - The guideline describes facilitators and barriers to its application.	2					Q18 - The guideline describes facilitators and barriers to its application.	3
	Q19 - The guideline provides advice and/or tools on how the recommendations can be put into practice.	6					Q19 - The guideline provides advice and/or tools on how the recommendations can be put into practice.	2					Q19 - The guideline provides advice and/or tools on how the recommendations can be put into practice.	5					Q19 - The guideline provides advice and/or tools on how the recommendations can be put into practice.	7					Q19 - The guideline provides advice and/or tools on how the recommendations can be put into practice.	1					Q19 - The guideline provides advice and/or tools on how the recommendations can be put into practice.	5
	Q20 - The potential resource implications of applying the recommendations have been considered.	6					Q20 - The potential resource implications of applying the recommendations have been considered.	2					Q20 - The potential resource implications of applying the recommendations have been considered.	3					Q20 - The potential resource implications of applying the recommendations have been considered.	5					Q20 - The potential resource implications of applying the recommendations have been considered.	2					Q20 - The potential resource implications of applying the recommendations have been considered.	2
	Q21 - The guideline presents monitoring and/or auditing criteria.	6					Q21 - The guideline presents monitoring and/or auditing criteria.	3					Q21 - The guideline presents monitoring and/or auditing criteria.	2					Q21 - The guideline presents monitoring and/or auditing criteria.	7					Q21 - The guideline presents monitoring and/or auditing criteria.	2					Q21 - The guideline presents monitoring and/or auditing criteria.	2
	Domain 6 - Editorial Independence						Domain 6 - Editorial Independence						Domain 6 - Editorial Independence						Domain 6 - Editorial Independence						Domain 6 - Editorial Independence						Domain 6 - Editorial Independence
	Q22 - The views of the funding body have not influenced the content of the guideline.	6					Q22 - The views of the funding body have not influenced the content of the guideline.	7					Q22 - The views of the funding body have not influenced the content of the guideline.	6					Q22 - The views of the funding body have not influenced the content of the guideline.	7					Q22 - The views of the funding body have not influenced the content of the guideline.	6					Q22 - The views of the funding body have not influenced the content of the guideline.	5
	Q23 - Competing interests of guideline development group members have been recorded and addressed.	7					Q23 - Competing interests of guideline development group members have been recorded and addressed.	6					Q23 - Competing interests of guideline development group members have been recorded and addressed.	5					Q23 - Competing interests of guideline development group members have been recorded and addressed.	6					Q23 - Competing interests of guideline development group members have been recorded and addressed.	6					Q23 - Competing interests of guideline development group members have been recorded and addressed.	6
	Overall Guideline Assessment						Overall Guideline Assessment						Overall Guideline Assessment						Overall Guideline Assessment						Overall Guideline Assessment						Overall Guideline Assessment
	Overall quality of this guideline	6					Overall quality of this guideline	5					Overall quality of this guideline	5					Overall quality of this guideline	6					Overall quality of this guideline	5					Overall quality of this guideline	5
	PHYSICAL ACTIVITY
U.S. Preventive Services Task Force (USPSTF). Healthy Diet and Physical Activity for Cardiovascular Disease Prevention in Adults With Cardiovascular Risk Factors: Behavioral Counseling Interventions. 2020. Available from: https://www.uspreventiveservicestaskforce.org/uspstf/recommendation/healthy-diet-and-physical-activity-counseling-adults-with-high-risk-of-cvd						Canadian Society for Exercise Physiology (CSEP). Canadian 24-Hour Movement Guidelines for Adults aged 18-64 Years and Adults aged 65 Years or Older: An Integration of Physical Activity, Sedentary Behaviour, and Sleep. 2020. Available from: https://cdnsciencepub.com/doi/full/10.1139/apnm-2020-0467						World Health Organization (WHO). WHO Guidelines on Physical Activity and Sedentary Behaviour. 2020. Available from: https://www.who.int/publications/i/item/9789240015128						Diabetes Canada Clinical Practice Guidelines Expert Committee. Diabetes Canada 2018 Clinical Practice Guidelines for the Prevention and Management of Diabetes in Canada. Can J Diabetes. 2018;42(Suppl 1):S1-S325. Available from: http://guidelines.diabetes.ca/cpg						American College of Cardiology/American Heart Association Task Force on Clinical Practice Guidelines. 2019 ACC/AHA Guideline on the Primary Prevention of Cardiovascular Disease. J Am Coll Cardiol 2019 Sep 74(10) pp e177-e232. Available from: https://www.jacc.org/doi/10.1016/j.jacc.2019.03.010						Department of Veterans Affairs / Department of Defense. VA/DoD Clinical Practice Guideline for the Management of Dyslipidemia for Cardiovascular Risk Reduction (Lipids). 2020. Available from: https://www.healthquality.va.gov/guidelines/CD/lipids/						Hypertension Canada. Hypertension Canada’s 2020 Comprehensive Guidelines for the Prevention, Diagnosis, Risk Assessment, and Treatment of Hypertension in Adults and Children. 2020. Available from: https://www.onlinecjc.ca/article/S0828-282X(20)30191-4/fulltext						ACOG Committee on Clinical Practice Guidelines. Osteoporosis Prevention, Screening, and Diagnosis. ACOG Clinical Practice Guideline No. 1. 2021. Available from: https://journals.lww.com/greenjournal/ Fulltext/2021/09000/Osteoporosis_Prevention,_Screening,_and_Diagnosis_.30.aspx						Institute for Clinical Systems Improvement (ICSI). Diagnosis and Treatment of Osteoporosis. 2017. Available from: https://www.icsi.org/guideline/osteoporosis/
	Item	Score					Item	Score					Item	Score					Item	Score					Item	Score					Item	Score					Item	Score					Item	Score					Item
	Domain 1 - Scope and Purpose						Domain 1 - Scope and Purpose						Domain 1 - Scope and Purpose						Domain 1 - Scope and Purpose						Domain 1 - Scope and Purpose						Domain 1 - Scope and Purpose						Domain 1 - Scope and Purpose						Domain 1 - Scope and Purpose						Domain 1 - Scope and Purpose
	Q1 - The overall objective(s) of the guideline is (are) specifically described.	7					Q1 - The overall objective(s) of the guideline is (are) specifically described.	7					Q1 - The overall objective(s) of the guideline is (are) specifically described.	7					Q1 - The overall objective(s) of the guideline is (are) specifically described.	7					Q1 - The overall objective(s) of the guideline is (are) specifically described.	6					Q1 - The overall objective(s) of the guideline is (are) specifically described.	7					Q1 - The overall objective(s) of the guideline is (are) specifically described.	6					Q1 - The overall objective(s) of the guideline is (are) specifically described.	6					Q1 - The overall objective(s) of the guideline is (are) specifically described.
	Q2 - The health question(s) covered by the guideline is (are) specifically described.	6					Q2 - The health question(s) covered by the guideline is (are) specifically described.	6					Q2 - The health question(s) covered by the guideline is (are) specifically described.	7					Q2 - The health question(s) covered by the guideline is (are) specifically described.	6					Q2 - The health question(s) covered by the guideline is (are) specifically described.	3					Q2 - The health question(s) covered by the guideline is (are) specifically described.	7					Q2 - The health question(s) covered by the guideline is (are) specifically described.	3					Q2 - The health question(s) covered by the guideline is (are) specifically described.	7					Q2 - The health question(s) covered by the guideline is (are) specifically described.
	Q3 - The population (patients, public, etc.) to whom the guideline is meant to apply is specifically described.	7					Q3 - The population (patients, public, etc.) to whom the guideline is meant to apply is specifically described.	7					Q3 - The population (patients, public, etc.) to whom the guideline is meant to apply is specifically described.	7					Q3 - The population (patients, public, etc.) to whom the guideline is meant to apply is specifically described.	6					Q3 - The population (patients, public, etc.) to whom the guideline is meant to apply is specifically described.	5					Q3 - The population (patients, public, etc.) to whom the guideline is meant to apply is specifically described.	7					Q3 - The population (patients, public, etc.) to whom the guideline is meant to apply is specifically described.	4					Q3 - The population (patients, public, etc.) to whom the guideline is meant to apply is specifically described.	7					Q3 - The population (patients, public, etc.) to whom the guideline is meant to apply is specifically described.
	Domain 2 - Stakeholder Involvement						Domain 2 - Stakeholder Involvement						Domain 2 - Stakeholder Involvement						Domain 2 - Stakeholder Involvement						Domain 2 - Stakeholder Involvement						Domain 2 - Stakeholder Involvement						Domain 2 - Stakeholder Involvement						Domain 2 - Stakeholder Involvement						Domain 2 - Stakeholder Involvement
	Q4 - The guideline development group includes individuals from all relevant professional groups.	6					Q4 - The guideline development group includes individuals from all relevant professional groups.	6					Q4 - The guideline development group includes individuals from all relevant professional groups.	7					Q4 - The guideline development group includes individuals from all relevant professional groups.	7					Q4 - The guideline development group includes individuals from all relevant professional groups.	7					Q4 - The guideline development group includes individuals from all relevant professional groups.	7					Q4 - The guideline development group includes individuals from all relevant professional groups.	7					Q4 - The guideline development group includes individuals from all relevant professional groups.	3					Q4 - The guideline development group includes individuals from all relevant professional groups.
	Q5 - The views and preferences of the target population (patients, public, etc.) have been sought.	3					Q5 - The views and preferences of the target population (patients, public, etc.) have been sought.	6					Q5 - The views and preferences of the target population (patients, public, etc.) have been sought.	7					Q5 - The views and preferences of the target population (patients, public, etc.) have been sought.	6					Q5 - The views and preferences of the target population (patients, public, etc.) have been sought.	5					Q5 - The views and preferences of the target population (patients, public, etc.) have been sought.	6					Q5 - The views and preferences of the target population (patients, public, etc.) have been sought.	2					Q5 - The views and preferences of the target population (patients, public, etc.) have been sought.	1					Q5 - The views and preferences of the target population (patients, public, etc.) have been sought.
	Q6 - The target users of the guideline are clearly defined.	4					Q6 - The target users of the guideline are clearly defined.	7					Q6 - The target users of the guideline are clearly defined.	7					Q6 - The target users of the guideline are clearly defined.	6					Q6 - The target users of the guideline are clearly defined.	5					Q6 - The target users of the guideline are clearly defined.	6					Q6 - The target users of the guideline are clearly defined.	3					Q6 - The target users of the guideline are clearly defined.	3					Q6 - The target users of the guideline are clearly defined.
	Domain 3 - Rigour of Development						Domain 3 - Rigour of Development						Domain 3 - Rigour of Development						Domain 3 - Rigour of Development						Domain 3 - Rigour of Development						Domain 3 - Rigour of Development						Domain 3 - Rigour of Development						Domain 3 - Rigour of Development						Domain 3 - Rigour of Development
	Q7 - Systematic methods were used to search for evidence.	7					Q7 - Systematic methods were used to search for evidence.	6					Q7 - Systematic methods were used to search for evidence.	7					Q7 - Systematic methods were used to search for evidence.	5					Q7 - Systematic methods were used to search for evidence.	7					Q7 - Systematic methods were used to search for evidence.	7					Q7 - Systematic methods were used to search for evidence.	4					Q7 - Systematic methods were used to search for evidence.	7					Q7 - Systematic methods were used to search for evidence.
	Q8 - The criteria for selecting the evidence are clearly described.	7					Q8 - The criteria for selecting the evidence are clearly described.	6					Q8 - The criteria for selecting the evidence are clearly described.	7					Q8 - The criteria for selecting the evidence are clearly described.	4					Q8 - The criteria for selecting the evidence are clearly described.	7					Q8 - The criteria for selecting the evidence are clearly described.	7					Q8 - The criteria for selecting the evidence are clearly described.	2					Q8 - The criteria for selecting the evidence are clearly described.	5					Q8 - The criteria for selecting the evidence are clearly described.
	Q9 - The strengths and limitations of the body of evidence are clearly described.	6					Q9 - The strengths and limitations of the body of evidence are clearly described.	7					Q9 - The strengths and limitations of the body of evidence are clearly described.	7					Q9 - The strengths and limitations of the body of evidence are clearly described.	5					Q9 - The strengths and limitations of the body of evidence are clearly described.	5					Q9 - The strengths and limitations of the body of evidence are clearly described.	6					Q9 - The strengths and limitations of the body of evidence are clearly described.	5					Q9 - The strengths and limitations of the body of evidence are clearly described.	5					Q9 - The strengths and limitations of the body of evidence are clearly described.
	Q10 - The methods for formulating the recommendations are clearly described.	6					Q10 - The methods for formulating the recommendations are clearly described.	6					Q10 - The methods for formulating the recommendations are clearly described.	7					Q10 - The methods for formulating the recommendations are clearly described.	6					Q10 - The methods for formulating the recommendations are clearly described.	5					Q10 - The methods for formulating the recommendations are clearly described.	6					Q10 - The methods for formulating the recommendations are clearly described.	6					Q10 - The methods for formulating the recommendations are clearly described.	6					Q10 - The methods for formulating the recommendations are clearly described.
	Q11 - The health benefits, side effects, and risks have been considered in formulating the recommendations.	6					Q11 - The health benefits, side effects, and risks have been considered in formulating the recommendations.	6					Q11 - The health benefits, side effects, and risks have been considered in formulating the recommendations.	7					Q11 - The health benefits, side effects, and risks have been considered in formulating the recommendations.	6					Q11 - The health benefits, side effects, and risks have been considered in formulating the recommendations.	7					Q11 - The health benefits, side effects, and risks have been considered in formulating the recommendations.	6					Q11 - The health benefits, side effects, and risks have been considered in formulating the recommendations.	5					Q11 - The health benefits, side effects, and risks have been considered in formulating the recommendations.	5					Q11 - The health benefits, side effects, and risks have been considered in formulating the recommendations.
	Q12 - There is an explicit link between the recommendations and the supporting evidence.	6					Q12 - There is an explicit link between the recommendations and the supporting evidence.	3					Q12 - There is an explicit link between the recommendations and the supporting evidence.	6					Q12 - There is an explicit link between the recommendations and the supporting evidence.	6					Q12 - There is an explicit link between the recommendations and the supporting evidence.	7					Q12 - There is an explicit link between the recommendations and the supporting evidence.	7					Q12 - There is an explicit link between the recommendations and the supporting evidence.	7					Q12 - There is an explicit link between the recommendations and the supporting evidence.	6					Q12 - There is an explicit link between the recommendations and the supporting evidence.
	Q13 - The guideline has been externally reviewed by experts prior to its publication.	4					Q13 - The guideline has been externally reviewed by experts prior to its publication.	7					Q13 - The guideline has been externally reviewed by experts prior to its publication.	6					Q13 - The guideline has been externally reviewed by experts prior to its publication.	5					Q13 - The guideline has been externally reviewed by experts prior to its publication.	5					Q13 - The guideline has been externally reviewed by experts prior to its publication.	5					Q13 - The guideline has been externally reviewed by experts prior to its publication.	2					Q13 - The guideline has been externally reviewed by experts prior to its publication.	3					Q13 - The guideline has been externally reviewed by experts prior to its publication.
	Q14 - A procedure for updating the guideline is provided.	5					Q14 - A procedure for updating the guideline is provided.	6					Q14 - A procedure for updating the guideline is provided.	7					Q14 - A procedure for updating the guideline is provided.	4					Q14 - A procedure for updating the guideline is provided.	4					Q14 - A procedure for updating the guideline is provided.	4					Q14 - A procedure for updating the guideline is provided.	6					Q14 - A procedure for updating the guideline is provided.	6					Q14 - A procedure for updating the guideline is provided.
	Domain 4 - Clarity of Presentation						Domain 4 - Clarity of Presentation						Domain 4 - Clarity of Presentation						Domain 4 - Clarity of Presentation						Domain 4 - Clarity of Presentation						Domain 4 - Clarity of Presentation						Domain 4 - Clarity of Presentation						Domain 4 - Clarity of Presentation						Domain 4 - Clarity of Presentation
	Q15 - The recommendations are specific and unambiguous.	6					Q15 - The recommendations are specific and unambiguous.	6					Q15 - The recommendations are specific and unambiguous.	7					Q15 - The recommendations are specific and unambiguous.	7					Q15 - The recommendations are specific and unambiguous.	7					Q15 - The recommendations are specific and unambiguous.	7					Q15 - The recommendations are specific and unambiguous.	7					Q15 - The recommendations are specific and unambiguous.	6					Q15 - The recommendations are specific and unambiguous.
	Q16 - The different options for management of the condition or health issue are clearly presented.	7					Q16 - The different options for management of the condition or health issue are clearly presented.	6					Q16 - The different options for management of the condition or health issue are clearly presented.	6					Q16 - The different options for management of the condition or health issue are clearly presented.	7					Q16 - The different options for management of the condition or health issue are clearly presented.	7					Q16 - The different options for management of the condition or health issue are clearly presented.	7					Q16 - The different options for management of the condition or health issue are clearly presented.	7					Q16 - The different options for management of the condition or health issue are clearly presented.	5					Q16 - The different options for management of the condition or health issue are clearly presented.
	Q17 - Key recommendations are easily identifiable	7					Q17 - Key recommendations are easily identifiable	6					Q17 - Key recommendations are easily identifiable	7					Q17 - Key recommendations are easily identifiable	6					Q17 - Key recommendations are easily identifiable	7					Q17 - Key recommendations are easily identifiable	6					Q17 - Key recommendations are easily identifiable	7					Q17 - Key recommendations are easily identifiable	7					Q17 - Key recommendations are easily identifiable
	Domain 5 - Applicability						Domain 5 - Applicability						Domain 5 - Applicability						Domain 5 - Applicability						Domain 5 - Applicability						Domain 5 - Applicability						Domain 5 - Applicability						Domain 5 - Applicability						Domain 5 - Applicability
	Q18 - The guideline describes facilitators and barriers to its application.	4					Q18 - The guideline describes facilitators and barriers to its application.	6					Q18 - The guideline describes facilitators and barriers to its application.	7					Q18 - The guideline describes facilitators and barriers to its application.	4					Q18 - The guideline describes facilitators and barriers to its application.	4					Q18 - The guideline describes facilitators and barriers to its application.	5					Q18 - The guideline describes facilitators and barriers to its application.	4					Q18 - The guideline describes facilitators and barriers to its application.	3					Q18 - The guideline describes facilitators and barriers to its application.
	Q19 - The guideline provides advice and/or tools on how the recommendations can be put into practice.	4					Q19 - The guideline provides advice and/or tools on how the recommendations can be put into practice.	7					Q19 - The guideline provides advice and/or tools on how the recommendations can be put into practice.	7					Q19 - The guideline provides advice and/or tools on how the recommendations can be put into practice.	6					Q19 - The guideline provides advice and/or tools on how the recommendations can be put into practice.	3					Q19 - The guideline provides advice and/or tools on how the recommendations can be put into practice.	7					Q19 - The guideline provides advice and/or tools on how the recommendations can be put into practice.	6					Q19 - The guideline provides advice and/or tools on how the recommendations can be put into practice.	2					Q19 - The guideline provides advice and/or tools on how the recommendations can be put into practice.
	Q20 - The potential resource implications of applying the recommendations have been considered.	3					Q20 - The potential resource implications of applying the recommendations have been considered.	6					Q20 - The potential resource implications of applying the recommendations have been considered.	7					Q20 - The potential resource implications of applying the recommendations have been considered.	1					Q20 - The potential resource implications of applying the recommendations have been considered.	4					Q20 - The potential resource implications of applying the recommendations have been considered.	5					Q20 - The potential resource implications of applying the recommendations have been considered.	2					Q20 - The potential resource implications of applying the recommendations have been considered.	2					Q20 - The potential resource implications of applying the recommendations have been considered.
	Q21 - The guideline presents monitoring and/or auditing criteria.	2					Q21 - The guideline presents monitoring and/or auditing criteria.	6					Q21 - The guideline presents monitoring and/or auditing criteria.	7					Q21 - The guideline presents monitoring and/or auditing criteria.	2					Q21 - The guideline presents monitoring and/or auditing criteria.	2					Q21 - The guideline presents monitoring and/or auditing criteria.	3					Q21 - The guideline presents monitoring and/or auditing criteria.	2					Q21 - The guideline presents monitoring and/or auditing criteria.	3					Q21 - The guideline presents monitoring and/or auditing criteria.
	Domain 6 - Editorial Independence						Domain 6 - Editorial Independence						Domain 6 - Editorial Independence						Domain 6 - Editorial Independence						Domain 6 - Editorial Independence						Domain 6 - Editorial Independence						Domain 6 - Editorial Independence						Domain 6 - Editorial Independence						Domain 6 - Editorial Independence
	Q22 - The views of the funding body have not influenced the content of the guideline.	7					Q22 - The views of the funding body have not influenced the content of the guideline.	7					Q22 - The views of the funding body have not influenced the content of the guideline.	5					Q22 - The views of the funding body have not influenced the content of the guideline.	6					Q22 - The views of the funding body have not influenced the content of the guideline.	7					Q22 - The views of the funding body have not influenced the content of the guideline.	1					Q22 - The views of the funding body have not influenced the content of the guideline.	6					Q22 - The views of the funding body have not influenced the content of the guideline.	7					Q22 - The views of the funding body have not influenced the content of the guideline.
	Q23 - Competing interests of guideline development group members have been recorded and addressed.	6					Q23 - Competing interests of guideline development group members have been recorded and addressed.	6					Q23 - Competing interests of guideline development group members have been recorded and addressed.	7					Q23 - Competing interests of guideline development group members have been recorded and addressed.	5					Q23 - Competing interests of guideline development group members have been recorded and addressed.	7					Q23 - Competing interests of guideline development group members have been recorded and addressed.	4					Q23 - Competing interests of guideline development group members have been recorded and addressed.	5					Q23 - Competing interests of guideline development group members have been recorded and addressed.	6					Q23 - Competing interests of guideline development group members have been recorded and addressed.
	Overall Guideline Assessment						Overall Guideline Assessment						Overall Guideline Assessment						Overall Guideline Assessment						Overall Guideline Assessment						Overall Guideline Assessment						Overall Guideline Assessment						Overall Guideline Assessment						Overall Guideline Assessment
	Overall quality of this guideline	6					Overall quality of this guideline	6					Overall quality of this guideline	7					Overall quality of this guideline	6					Overall quality of this guideline	6					Overall quality of this guideline	5					Overall quality of this guideline	4					Overall quality of this guideline	5					Overall quality of this guideline
	PROSTATE CANCER
Screening for Prostate Cancer: US Preventive Services Task Force Recommendation Statement. 2018. Available from: https://www.uspreventiveservicestaskforce.org/uspstf/recommendation/prostate-cancer-screening						American Urological Association. Early Detection of Prostate Cancer: AUA Guideline. 2018 update. Available from: https://www.auanet.org/guidelines/guidelines/prostate-cancer-early-detection-guideline						Canadian Urological Association Recommendations on Prostate Cancer Screening and Early Diagnosis. 2017. Available from: https://cuaj.ca/index.php/journal/article/view/4888
	Item	Score					Item	Score					Item	Score
	Domain 1 - Scope and Purpose						Domain 1 - Scope and Purpose						Domain 1 - Scope and Purpose
	Q1 - The overall objective(s) of the guideline is (are) specifically described.	7					Q1 - The overall objective(s) of the guideline is (are) specifically described.	6					Q1 - The overall objective(s) of the guideline is (are) specifically described.	6
	Q2 - The health question(s) covered by the guideline is (are) specifically described.	7					Q2 - The health question(s) covered by the guideline is (are) specifically described.	5					Q2 - The health question(s) covered by the guideline is (are) specifically described.	6
	Q3 - The population (patients, public, etc.) to whom the guideline is meant to apply is specifically described.	6					Q3 - The population (patients, public, etc.) to whom the guideline is meant to apply is specifically described.	6					Q3 - The population (patients, public, etc.) to whom the guideline is meant to apply is specifically described.	6
	Domain 2 - Stakeholder Involvement						Domain 2 - Stakeholder Involvement						Domain 2 - Stakeholder Involvement
	Q4 - The guideline development group includes individuals from all relevant professional groups.	4					Q4 - The guideline development group includes individuals from all relevant professional groups.	2					Q4 - The guideline development group includes individuals from all relevant professional groups.	5
	Q5 - The views and preferences of the target population (patients, public, etc.) have been sought.	3					Q5 - The views and preferences of the target population (patients, public, etc.) have been sought.	4					Q5 - The views and preferences of the target population (patients, public, etc.) have been sought.	2
	Q6 - The target users of the guideline are clearly defined.	4					Q6 - The target users of the guideline are clearly defined.	6					Q6 - The target users of the guideline are clearly defined.	5
	Domain 3 - Rigour of Development						Domain 3 - Rigour of Development						Domain 3 - Rigour of Development
	Q7 - Systematic methods were used to search for evidence.	7					Q7 - Systematic methods were used to search for evidence.	6					Q7 - Systematic methods were used to search for evidence.	6
	Q8 - The criteria for selecting the evidence are clearly described.	7					Q8 - The criteria for selecting the evidence are clearly described.	6					Q8 - The criteria for selecting the evidence are clearly described.	5
	Q9 - The strengths and limitations of the body of evidence are clearly described.	7					Q9 - The strengths and limitations of the body of evidence are clearly described.	6					Q9 - The strengths and limitations of the body of evidence are clearly described.	4
	Q10 - The methods for formulating the recommendations are clearly described.	6					Q10 - The methods for formulating the recommendations are clearly described.	5					Q10 - The methods for formulating the recommendations are clearly described.	4
	Q11 - The health benefits, side effects, and risks have been considered in formulating the recommendations.	7					Q11 - The health benefits, side effects, and risks have been considered in formulating the recommendations.	6					Q11 - The health benefits, side effects, and risks have been considered in formulating the recommendations.	5
	Q12 - There is an explicit link between the recommendations and the supporting evidence.	6					Q12 - There is an explicit link between the recommendations and the supporting evidence.	6					Q12 - There is an explicit link between the recommendations and the supporting evidence.	6
	Q13 - The guideline has been externally reviewed by experts prior to its publication.	5					Q13 - The guideline has been externally reviewed by experts prior to its publication.	6					Q13 - The guideline has been externally reviewed by experts prior to its publication.	3
	Q14 - A procedure for updating the guideline is provided.	6					Q14 - A procedure for updating the guideline is provided.	2					Q14 - A procedure for updating the guideline is provided.	1
	Domain 4 - Clarity of Presentation						Domain 4 - Clarity of Presentation						Domain 4 - Clarity of Presentation
	Q15 - The recommendations are specific and unambiguous.	6					Q15 - The recommendations are specific and unambiguous.	7					Q15 - The recommendations are specific and unambiguous.	6
	Q16 - The different options for management of the condition or health issue are clearly presented.	5					Q16 - The different options for management of the condition or health issue are clearly presented.	5					Q16 - The different options for management of the condition or health issue are clearly presented.	6
	Q17 - Key recommendations are easily identifiable	6					Q17 - Key recommendations are easily identifiable	6					Q17 - Key recommendations are easily identifiable	7
	Domain 5 - Applicability						Domain 5 - Applicability						Domain 5 - Applicability
	Q18 - The guideline describes facilitators and barriers to its application.	3					Q18 - The guideline describes facilitators and barriers to its application.	3					Q18 - The guideline describes facilitators and barriers to its application.	2
	Q19 - The guideline provides advice and/or tools on how the recommendations can be put into practice.	6					Q19 - The guideline provides advice and/or tools on how the recommendations can be put into practice.	6					Q19 - The guideline provides advice and/or tools on how the recommendations can be put into practice.	5
	Q20 - The potential resource implications of applying the recommendations have been considered.	3					Q20 - The potential resource implications of applying the recommendations have been considered.	3					Q20 - The potential resource implications of applying the recommendations have been considered.	2
	Q21 - The guideline presents monitoring and/or auditing criteria.	3					Q21 - The guideline presents monitoring and/or auditing criteria.	4					Q21 - The guideline presents monitoring and/or auditing criteria.	4
	Domain 6 - Editorial Independence						Domain 6 - Editorial Independence						Domain 6 - Editorial Independence
	Q22 - The views of the funding body have not influenced the content of the guideline.	6					Q22 - The views of the funding body have not influenced the content of the guideline.	6					Q22 - The views of the funding body have not influenced the content of the guideline.	1
	Q23 - Competing interests of guideline development group members have been recorded and addressed.	6					Q23 - Competing interests of guideline development group members have been recorded and addressed.	5					Q23 - Competing interests of guideline development group members have been recorded and addressed.	2
	Overall Guideline Assessment						Overall Guideline Assessment						Overall Guideline Assessment
	Overall quality of this guideline	6					Overall quality of this guideline	5					Overall quality of this guideline	4
	TOBACCO USE
U.S. Preventive Services Task Force (USPSTF). Tobacco Smoking Cessation in Adults, Including Pregnant Persons: Interventions. 2021. Available from: https://www.uspreventiveservicestaskforce.org/uspstf/ recommendation/tobacco-use-in-adults-and-pregnant-women-counseling-and-interventions						American College of Chest Physicians. Screening for Lung Cancer: CHEST Guideline and Expert Panel Report. 2021.						American College of Cardiology/American Heart Association Task Force on Clinical Practice Guidelines. 2019 ACC/AHA Guideline on the Primary Prevention of Cardiovascular Disease. J Am Coll Cardiol 2019 Sep 74(10) pp e177-e232. Available from: https://www.jacc.org/doi/10.1016/j.jacc.2019.03.010						Hypertension Canada. Hypertension Canada’s 2020 Comprehensive Guidelines for the Prevention, Diagnosis, Risk Assessment, and Treatment of Hypertension in Adults and Children. 2020. Available from: https://www.onlinecjc.ca/article/S0828-282X(20)30191-4/fulltext						Institute for Clinical Systems Improvement (ICSI). Diagnosis and Treatment of Osteoporosis. 2017. Available from: https://www.icsi.org/guideline/osteoporosis/						Registered Nurses’ Association of Ontario (RNAO). Integrating Tobacco Interventions into Daily Practice: Third Edition. 2017. Available from: https://rnao.ca/bpg/guidelines/integrating-tobacco-interventions-daily-practice
	Item	Score					Item	Score					Item	Score					Item	Score					Item	Score					Item	Score
	Domain 1 - Scope and Purpose						Domain 1 - Scope and Purpose						Domain 1 - Scope and Purpose						Domain 1 - Scope and Purpose						Domain 1 - Scope and Purpose						Domain 1 - Scope and Purpose
	Q1 - The overall objective(s) of the guideline is (are) specifically described.	6					Q1 - The overall objective(s) of the guideline is (are) specifically described.	7					Q1 - The overall objective(s) of the guideline is (are) specifically described.	6					Q1 - The overall objective(s) of the guideline is (are) specifically described.	6					Q1 - The overall objective(s) of the guideline is (are) specifically described.	7					Q1 - The overall objective(s) of the guideline is (are) specifically described.	6
	Q2 - The health question(s) covered by the guideline is (are) specifically described.	6					Q2 - The health question(s) covered by the guideline is (are) specifically described.	7					Q2 - The health question(s) covered by the guideline is (are) specifically described.	3					Q2 - The health question(s) covered by the guideline is (are) specifically described.	3					Q2 - The health question(s) covered by the guideline is (are) specifically described.	6					Q2 - The health question(s) covered by the guideline is (are) specifically described.	6
	Q3 - The population (patients, public, etc.) to whom the guideline is meant to apply is specifically described.	7					Q3 - The population (patients, public, etc.) to whom the guideline is meant to apply is specifically described.	6					Q3 - The population (patients, public, etc.) to whom the guideline is meant to apply is specifically described.	5					Q3 - The population (patients, public, etc.) to whom the guideline is meant to apply is specifically described.	4					Q3 - The population (patients, public, etc.) to whom the guideline is meant to apply is specifically described.	7					Q3 - The population (patients, public, etc.) to whom the guideline is meant to apply is specifically described.	5
	Domain 2 - Stakeholder Involvement						Domain 2 - Stakeholder Involvement						Domain 2 - Stakeholder Involvement						Domain 2 - Stakeholder Involvement						Domain 2 - Stakeholder Involvement						Domain 2 - Stakeholder Involvement
	Q4 - The guideline development group includes individuals from all relevant professional groups.	6					Q4 - The guideline development group includes individuals from all relevant professional groups.	7					Q4 - The guideline development group includes individuals from all relevant professional groups.	7					Q4 - The guideline development group includes individuals from all relevant professional groups.	7					Q4 - The guideline development group includes individuals from all relevant professional groups.	6					Q4 - The guideline development group includes individuals from all relevant professional groups.	7
	Q5 - The views and preferences of the target population (patients, public, etc.) have been sought.	4					Q5 - The views and preferences of the target population (patients, public, etc.) have been sought.	2					Q5 - The views and preferences of the target population (patients, public, etc.) have been sought.	5					Q5 - The views and preferences of the target population (patients, public, etc.) have been sought.	2					Q5 - The views and preferences of the target population (patients, public, etc.) have been sought.	6					Q5 - The views and preferences of the target population (patients, public, etc.) have been sought.	3
	Q6 - The target users of the guideline are clearly defined.	4					Q6 - The target users of the guideline are clearly defined.	7					Q6 - The target users of the guideline are clearly defined.	5					Q6 - The target users of the guideline are clearly defined.	3					Q6 - The target users of the guideline are clearly defined.	6					Q6 - The target users of the guideline are clearly defined.	6
	Domain 3 - Rigour of Development						Domain 3 - Rigour of Development						Domain 3 - Rigour of Development						Domain 3 - Rigour of Development						Domain 3 - Rigour of Development						Domain 3 - Rigour of Development
	Q7 - Systematic methods were used to search for evidence.	7					Q7 - Systematic methods were used to search for evidence.	7					Q7 - Systematic methods were used to search for evidence.	7					Q7 - Systematic methods were used to search for evidence.	4					Q7 - Systematic methods were used to search for evidence.	5					Q7 - Systematic methods were used to search for evidence.	5
	Q8 - The criteria for selecting the evidence are clearly described.	6					Q8 - The criteria for selecting the evidence are clearly described.	7					Q8 - The criteria for selecting the evidence are clearly described.	7					Q8 - The criteria for selecting the evidence are clearly described.	2					Q8 - The criteria for selecting the evidence are clearly described.	4					Q8 - The criteria for selecting the evidence are clearly described.	6
	Q9 - The strengths and limitations of the body of evidence are clearly described.	6					Q9 - The strengths and limitations of the body of evidence are clearly described.	7					Q9 - The strengths and limitations of the body of evidence are clearly described.	5					Q9 - The strengths and limitations of the body of evidence are clearly described.	5					Q9 - The strengths and limitations of the body of evidence are clearly described.	5					Q9 - The strengths and limitations of the body of evidence are clearly described.	6
	Q10 - The methods for formulating the recommendations are clearly described.	6					Q10 - The methods for formulating the recommendations are clearly described.	6					Q10 - The methods for formulating the recommendations are clearly described.	5					Q10 - The methods for formulating the recommendations are clearly described.	6					Q10 - The methods for formulating the recommendations are clearly described.	4					Q10 - The methods for formulating the recommendations are clearly described.	5
	Q11 - The health benefits, side effects, and risks have been considered in formulating the recommendations.	6					Q11 - The health benefits, side effects, and risks have been considered in formulating the recommendations.	7					Q11 - The health benefits, side effects, and risks have been considered in formulating the recommendations.	7					Q11 - The health benefits, side effects, and risks have been considered in formulating the recommendations.	5					Q11 - The health benefits, side effects, and risks have been considered in formulating the recommendations.	7					Q11 - The health benefits, side effects, and risks have been considered in formulating the recommendations.	6
	Q12 - There is an explicit link between the recommendations and the supporting evidence.	5					Q12 - There is an explicit link between the recommendations and the supporting evidence.	7					Q12 - There is an explicit link between the recommendations and the supporting evidence.	7					Q12 - There is an explicit link between the recommendations and the supporting evidence.	7					Q12 - There is an explicit link between the recommendations and the supporting evidence.	5					Q12 - There is an explicit link between the recommendations and the supporting evidence.	6
	Q13 - The guideline has been externally reviewed by experts prior to its publication.	5					Q13 - The guideline has been externally reviewed by experts prior to its publication.	6					Q13 - The guideline has been externally reviewed by experts prior to its publication.	5					Q13 - The guideline has been externally reviewed by experts prior to its publication.	2					Q13 - The guideline has been externally reviewed by experts prior to its publication.	6					Q13 - The guideline has been externally reviewed by experts prior to its publication.	6
	Q14 - A procedure for updating the guideline is provided.	5					Q14 - A procedure for updating the guideline is provided.	6					Q14 - A procedure for updating the guideline is provided.	4					Q14 - A procedure for updating the guideline is provided.	6					Q14 - A procedure for updating the guideline is provided.	6					Q14 - A procedure for updating the guideline is provided.	7
	Domain 4 - Clarity of Presentation						Domain 4 - Clarity of Presentation						Domain 4 - Clarity of Presentation						Domain 4 - Clarity of Presentation						Domain 4 - Clarity of Presentation						Domain 4 - Clarity of Presentation
	Q15 - The recommendations are specific and unambiguous.	6					Q15 - The recommendations are specific and unambiguous.	6					Q15 - The recommendations are specific and unambiguous.	7					Q15 - The recommendations are specific and unambiguous.	7					Q15 - The recommendations are specific and unambiguous.	6					Q15 - The recommendations are specific and unambiguous.	7
	Q16 - The different options for management of the condition or health issue are clearly presented.	6					Q16 - The different options for management of the condition or health issue are clearly presented.	5					Q16 - The different options for management of the condition or health issue are clearly presented.	7					Q16 - The different options for management of the condition or health issue are clearly presented.	7					Q16 - The different options for management of the condition or health issue are clearly presented.	6					Q16 - The different options for management of the condition or health issue are clearly presented.	6
	Q17 - Key recommendations are easily identifiable	7					Q17 - Key recommendations are easily identifiable	7					Q17 - Key recommendations are easily identifiable	7					Q17 - Key recommendations are easily identifiable	7					Q17 - Key recommendations are easily identifiable	5					Q17 - Key recommendations are easily identifiable	6
	Domain 5 - Applicability						Domain 5 - Applicability						Domain 5 - Applicability						Domain 5 - Applicability						Domain 5 - Applicability						Domain 5 - Applicability
	Q18 - The guideline describes facilitators and barriers to its application.	3					Q18 - The guideline describes facilitators and barriers to its application.	6					Q18 - The guideline describes facilitators and barriers to its application.	4					Q18 - The guideline describes facilitators and barriers to its application.	4					Q18 - The guideline describes facilitators and barriers to its application.	4					Q18 - The guideline describes facilitators and barriers to its application.	5
	Q19 - The guideline provides advice and/or tools on how the recommendations can be put into practice.	5					Q19 - The guideline provides advice and/or tools on how the recommendations can be put into practice.	4					Q19 - The guideline provides advice and/or tools on how the recommendations can be put into practice.	3					Q19 - The guideline provides advice and/or tools on how the recommendations can be put into practice.	6					Q19 - The guideline provides advice and/or tools on how the recommendations can be put into practice.	7					Q19 - The guideline provides advice and/or tools on how the recommendations can be put into practice.	5
	Q20 - The potential resource implications of applying the recommendations have been considered.	3					Q20 - The potential resource implications of applying the recommendations have been considered.	6					Q20 - The potential resource implications of applying the recommendations have been considered.	4					Q20 - The potential resource implications of applying the recommendations have been considered.	2					Q20 - The potential resource implications of applying the recommendations have been considered.	5					Q20 - The potential resource implications of applying the recommendations have been considered.	4
	Q21 - The guideline presents monitoring and/or auditing criteria.	3					Q21 - The guideline presents monitoring and/or auditing criteria.	2					Q21 - The guideline presents monitoring and/or auditing criteria.	2					Q21 - The guideline presents monitoring and/or auditing criteria.	2					Q21 - The guideline presents monitoring and/or auditing criteria.	7					Q21 - The guideline presents monitoring and/or auditing criteria.	5
	Domain 6 - Editorial Independence						Domain 6 - Editorial Independence						Domain 6 - Editorial Independence						Domain 6 - Editorial Independence						Domain 6 - Editorial Independence						Domain 6 - Editorial Independence
	Q22 - The views of the funding body have not influenced the content of the guideline.	7					Q22 - The views of the funding body have not influenced the content of the guideline.	6					Q22 - The views of the funding body have not influenced the content of the guideline.	7					Q22 - The views of the funding body have not influenced the content of the guideline.	6					Q22 - The views of the funding body have not influenced the content of the guideline.	7					Q22 - The views of the funding body have not influenced the content of the guideline.	6
	Q23 - Competing interests of guideline development group members have been recorded and addressed.	6					Q23 - Competing interests of guideline development group members have been recorded and addressed.	7					Q23 - Competing interests of guideline development group members have been recorded and addressed.	7					Q23 - Competing interests of guideline development group members have been recorded and addressed.	5					Q23 - Competing interests of guideline development group members have been recorded and addressed.	6					Q23 - Competing interests of guideline development group members have been recorded and addressed.	7
	Overall Guideline Assessment						Overall Guideline Assessment						Overall Guideline Assessment						Overall Guideline Assessment						Overall Guideline Assessment						Overall Guideline Assessment
	Overall quality of this guideline	6					Overall quality of this guideline	7					Overall quality of this guideline	6					Overall quality of this guideline	4					Overall quality of this guideline	6					Overall quality of this guideline	5
[truncated: 1 more columns]
